# Supplementary material
Source: PubMed Central journal article supplement (PMC4330505)
Supplement: npp2014267x1.pdf [file npp2014267x1.pdf]

**Table S1.** Summary demographics of the four studied European cohorts

| <b>Cohort</b>            | <b>Discovery cohort (Spain) N=1186</b> | <b>Follow-up cohort 1 (The Netherlands) N=962</b> | <b>Follow-up cohort 2 (Norway) N=1095</b> | <b>Follow-up cohort 3 (Germany) N=1948</b> | <b>All combined cohorts (N=5191)</b> |
|--------------------------|----------------------------------------|---------------------------------------------------|-------------------------------------------|--------------------------------------------|--------------------------------------|
| <b>Cases</b>             | 603                                    | 346                                               | 532                                       | 1226                                       | 2707                                 |
| <b>Gender</b>            |                                        |                                                   |                                           |                                            |                                      |
| Male                     | 416 (69%)                              | 164 (47%)                                         | 295 (55%)                                 | 641 (52%)                                  | 1513 (56%)                           |
| Female                   | 187 (31%)                              | 182 (53%)                                         | 237 (45%)                                 | 585 (48%)                                  | 1194 (44%)                           |
| <b>ADHD subtype</b>      |                                        |                                                   |                                           |                                            |                                      |
| Combined                 | 368 (61%)                              | 229 (67%)                                         | 351 (67%)                                 | 878 (72%)                                  | 1826(67%)                            |
| Inattentive              | 211 (35%)                              | 55 (16%)                                          | 54 (10%)                                  | 268 (22%)                                  | 588 (22%)                            |
| Hyperactive/Impulsive    | 21 (3.5%)                              | 12 (3%)                                           | 17 (3%)                                   | 80 (6%)                                    | 130 (5%)                             |
| Sub-threshold            | -                                      | -                                                 | 60 (11%)                                  | -                                          | 60 (2%)                              |
| Unknown                  | 3 (0.5%)                               | 50 (14%)                                          | 50 (9%)                                   | -                                          | 103 (4%)                             |
| <b>Age (mean and SD)</b> | 31.04 (11.7)                           | 36.15 (11.2)                                      | 34.2 (10.4)                               | 35.9 (10.5)                                | 33.7 (17.2)                          |
| <b>Controls</b>          | 583                                    | 616                                               | 563                                       | 722                                        | 2484                                 |
| <b>Gender</b>            |                                        |                                                   |                                           |                                            |                                      |
| Male                     | 402 (69%)                              | 297 (48%)                                         | 232 (41%)                                 | 371 (51%)                                  | 1302 (53%)                           |
| Female                   | 181 (31%)                              | 319 (52%)                                         | 331 (59%)                                 | 351 (49%)                                  | 1182 (47%)                           |
| <b>Age (mean and SD)</b> | 33.6 (21.3)                            | 53.5 (18.9)                                       | 28.5 (6.7)                                | 25.2 (6.5)                                 | 37.6 (11.9)                          |

**Table S2.** Selected markers within 10 loci included in the replication stage

| SNP        | Chr | Base pairs* | Nearest gene             | Clinical group of interest     |
|------------|-----|-------------|--------------------------|--------------------------------|
| rs1937444# | 1   | 66,463,920  | <i>PDE4B</i> **          | Inattentive ADHD               |
| rs10594    | 1   | 160,247,185 | <i>PEX19</i> ** (3'UTR)  | Overall ADHD                   |
| rs2232429  | 6   | 28,359,632  | <i>ZSCAN12</i> **        | Combined ADHD                  |
| rs12333188 | 6   | 143,065,590 | <i>GPR126</i>            | Inattentive ADHD               |
| rs1962749  | 6   | 153,551,654 |                          | Inattentive ADHD               |
| rs4416909  | 9   | 24,095,294  | <i>ELAVL2</i>            | Combined ADHD                  |
| rs1445594  | 13  | 58,675,299  | <i>PCDH17</i>            | Overall ADHD                   |
| rs1897792  | 14  | 39,697,568  |                          | Overall ADHD                   |
| rs4902569  | 14  | 39,858,941  |                          | Overall ADHD and Combined ADHD |
| rs2415543  | 14  | 39,860,216  |                          | Combined ADHD                  |
| rs2415545  | 14  | 39,863,802  |                          | Overall ADHD and Combined ADHD |
| rs3814860  | 14  | 39,868,646  | <i>FBXO33</i> (3'UTR)**  | Combined ADHD                  |
| rs17696574 | 14  | 39,967,531  |                          | Combined ADHD                  |
| rs11644983 | 16  | 80,314,901  | <i>DDYNLRB2</i>          | Overall ADHD                   |
| rs11646443 | 16  | 84,270,476  | <i>KCNG4</i> ** (EXON 1) | Overall ADHD and Combined ADHD |
| rs1988353  | 17  | 1,468,941   | <i>ACCN1</i> **          | Inattentive ADHD               |

\* Base pairs according to hg19 - NCBI Build 36

\*\* SNP within the gene

# Not tested in the replication phase due to experimental constraints

**Table S3.** Pooled analysis of seven SNPs in six independent genomic regions that reached suggestive evidence for association ( $PGC < 1e-05$ ) in the genome-wide association study in 2,707 adulthood ADHD patients and 2,484 controls from four European countries.

| Chr | Base pairs** | SNP (Risk Allele) | Spain<br>Discovery Cohort<br>N=1186<br>(603 cases, 583 controls) |                | Netherlands<br>Follow-up Cohort 1<br>N=962<br>(346 cases, 616 controls) |      | Norway<br>Follow-up Cohort 2<br>N=1095<br>(532 cases, 563 controls) |       | Germany<br>Follow-up Cohort 3<br>N=1948<br>(1,226 cases, 722 controls) |       | All Follow-up<br>Cohorts<br>N=4005<br>(2,104 cases, 1901 controls) |      | All Cohorts<br>N=5191<br>(2,707 cases, 2,484 controls) |                |
|-----|--------------|-------------------|------------------------------------------------------------------|----------------|-------------------------------------------------------------------------|------|---------------------------------------------------------------------|-------|------------------------------------------------------------------------|-------|--------------------------------------------------------------------|------|--------------------------------------------------------|----------------|
|     |              |                   | OR                                                               | P              | OR                                                                      | P    | OR                                                                  | P     | OR                                                                     | P     | OR                                                                 | P    | OR                                                     | P              |
| 1   | 158,513,809  | rs10594 (G)*      | <b>1.49</b>                                                      | <b>2.3e-06</b> | -                                                                       | -    | 0.95                                                                | 0.54  | 1.15                                                                   | 0.033 | 1.06                                                               | 0.14 | <b>1.13</b>                                            | <b>8.4e-04</b> |
| 13  | 57,573,300   | rs1445594 (A)     | <b>1.56</b>                                                      | <b>3.7e-06</b> | 0.92                                                                    | 0.43 | 1.04                                                                | 0.70  | 0.96                                                                   | 0.54  | 0.97                                                               | 0.56 | 1.06                                                   | 0.15           |
| 14  | 38,767,319   | rs1897792 (A)     | <b>1.56</b>                                                      | <b>5.8e-06</b> | 0.94                                                                    | 0.58 | 1.06                                                                | 0.63  | 0.78                                                                   | 0.42  | 0.99                                                               | 0.79 | <b>1.10</b>                                            | 0.05           |
| 14  | 38,928,692   | rs4902569 (G)     | <b>1.50</b>                                                      | <b>6.2e-06</b> | 1.07                                                                    | 0.53 | 1.08                                                                | 0.44  | 0.92                                                                   | 0.29  | 1.02                                                               | 0.74 | <b>1.11</b>                                            | 0.014          |
| 14  | 38,933,553   | rs2415545 (A)     | <b>1.47</b>                                                      | <b>3.8e-06</b> | 1.03                                                                    | 0.78 | 1.12                                                                | 0.20  | 0.98                                                                   | 0.73  | 1.02                                                               | 0.66 | <b>1.11</b>                                            | 9.7e-03        |
| 16  | 78,872,402   | rs11644983 (C)    | <b>2.08</b>                                                      | <b>5.4e-06</b> | 1.07                                                                    | 0.74 | 1.56                                                                | 0.014 | 0.97                                                                   | 0.82  | 1.12                                                               | 0.21 | <b>1.32</b>                                            | <b>6.6e-04</b> |
| 16  | 82,827,977   | rs11646443 (G)    | <b>1.61</b>                                                      | <b>3.8e-07</b> | 0.94                                                                    | 0.57 | 1.10                                                                | 0.30  | 0.92                                                                   | 0.24  | 0.98                                                               | 0.75 | <b>1.09</b>                                            | 0.049          |

\* Significant departure from HWE in the control sample from The Netherlands  
 In bold statistically significant P-values after Bonferroni correction ( $P < 3.3e-03$ )

**Table S4.** Pooled analysis of 11 SNPs in seven independent regions that reached suggestive evidence for association ( $PGC < 1e-05$ ) in the genome-wide association study in (a) 1,826 combined ADHD patients or (b) and 588 inattentive ADHD patients and 2,484 controls from four European countries

(a)

| Chr | Base pairs** | SNP (Risk Allele) | Spain<br>Discovery Cohort<br>N=951<br>(368 cases, 583 controls) |                | Netherlands<br>Follow-up Cohort 1<br>N=845<br>(229 cases, 616 controls) |      | Norway<br>Follow-up Cohort 2<br>N=914<br>(351 cases, 563 controls) |      | Germany<br>Follow-up Cohort 3<br>N=1,600<br>(878 cases, 722 controls) |      |      | All Follow-up<br>Cohorts<br>N=3,359<br>(1,458 cases, 1901 controls) |      | All Cohorts<br>N=4,310<br>(1,826 cases, 2,484 controls) |  |
|-----|--------------|-------------------|-----------------------------------------------------------------|----------------|-------------------------------------------------------------------------|------|--------------------------------------------------------------------|------|-----------------------------------------------------------------------|------|------|---------------------------------------------------------------------|------|---------------------------------------------------------|--|
|     |              |                   | OR                                                              | P              | OR                                                                      | P    | O                                                                  | OR   | P                                                                     | P    | OR   | P                                                                   | OR   | P                                                       |  |
| 6   | 28,467,611   | rs2232429 (G)     | <b>2.60</b>                                                     | <b>7.7e-08</b> | 1.12                                                                    | 0.53 | 1.32                                                               | 0.26 | 1.05                                                                  | 0.69 | 0.75 | 0.17                                                                | 1.11 | 0.19                                                    |  |
| 9   | 24,085,294   | rs4416909 (C)     | <b>1.54</b>                                                     | <b>4.5e-06</b> | 0.85                                                                    | 0.16 | 0.91                                                               | 0.32 | 1.09                                                                  | 0.22 | 0.96 | 0.43                                                                | 1.06 | 0.13                                                    |  |
| 14  | 38,928,692   | rs4902569 (G)     | <b>1.60</b>                                                     | <b>5.8e-06</b> | 1.07                                                                    | 0.58 | 1.09                                                               | 0.44 | 0.96                                                                  | 0.60 | 1.05 | 0.41                                                                | 1.14 | 5.9e-03                                                 |  |
| 14  | 38,929,967   | rs2415543 (A)     | <b>1.55</b>                                                     | <b>7.3e-06</b> | 1.01                                                                    | 0.96 | 1.08                                                               | 0.44 | 1.03                                                                  | 0.72 | 1.04 | 0.40                                                                | 1.13 | 6.4e-03                                                 |  |
| 14  | 38,933,553   | rs2415545 (A)     | <b>1.59</b>                                                     | <b>1.8e-06</b> | 1.01                                                                    | 0.94 | 1.14                                                               | 0.19 | 1.02                                                                  | 0.77 | 1.05 | 0.33                                                                | 1.14 | <b>3.0e-03</b>                                          |  |
| 14  | 38,938,397   | rs3814860 (A)     | <b>1.61</b>                                                     | <b>6.8e-06</b> | 1.12                                                                    | 0.35 | 1.14                                                               | 0.28 | 0.97                                                                  | 0.74 | 1.07 | 0.24                                                                | 1.16 | <b>2.5e-03</b>                                          |  |
| 14  | 39,037,282   | rs17696574 (G)    | <b>1.61</b>                                                     | <b>2.5e-06</b> | 0.95                                                                    | 0.69 | 1.14                                                               | 0.15 | 1.03                                                                  | 0.67 | 1.05 | 0.27                                                                | 1.14 | <b>3.1e-03</b>                                          |  |
| 16  | 82,827,977   | rs11646443 (G)    | <b>1.72</b>                                                     | <b>3.6e-07</b> | 0.94                                                                    | 0.62 | 1.10                                                               | 0.35 | 0.89                                                                  | 0.14 | 0.97 | 0.53                                                                | 1.07 | 0.11                                                    |  |

(b)

| Chr | Base pairs** | SNP (Risk Allele) | Spain<br>Discovery Cohort<br>N=794<br>(211 cases, 583 controls) |                | Netherlands<br>Follow-up Cohort 1<br>N=671<br>(55 cases, 616 controls) |              | Norway<br>Follow-up Cohort 2<br>N=617<br>(54 cases, 563 controls) |              | Germany<br>Follow-up Cohort 3<br>N=990<br>(268 cases, 720 controls) |      | All Follow-up<br>Cohorts<br>N=2,278<br>(377 cases, 1901 controls) |      | All Cohorts<br>N=3072<br>(588 cases, 2,484 controls) |                |
|-----|--------------|-------------------|-----------------------------------------------------------------|----------------|------------------------------------------------------------------------|--------------|-------------------------------------------------------------------|--------------|---------------------------------------------------------------------|------|-------------------------------------------------------------------|------|------------------------------------------------------|----------------|
|     |              |                   | OR                                                              | P              | OR                                                                     | P            | OR                                                                | P            | OR                                                                  | P    | OR                                                                | P    | OR                                                   | P              |
| 6   | 143,107,283  | rs12333188 (T)    | <b>4.07</b>                                                     | <b>2.3e-05</b> | 0.58                                                                   | 0.56         | 0                                                                 | 0.19         | 1.62                                                                | 0.27 | 1.15                                                              | 0.69 | <b>2.32</b>                                          | <b>3.0e-04</b> |
| 6   | 153,593,347  | rs1962749 (T)     | <b>1.29</b>                                                     | <b>1.3e-05</b> | <b>0.42</b>                                                            | <b>0.039</b> | 1.21                                                              | 0.65         | 1.28                                                                | 0.15 | 1.15                                                              | 0.32 | <b>1.48</b>                                          | <b>2.1e-04</b> |
| 17  | 28,493,054   | rs1988353 (A)     | <b>1.88</b>                                                     | <b>1.2e-06</b> | 1.06                                                                   | 0.80         | <b>1.65</b>                                                       | <b>0.038</b> | 0.94                                                                | 0.63 | 1.09                                                              | 0.35 | <b>1.32</b>                                          | <b>2.3e-04</b> |

In bold statistically significant P-values after Bonferroni correction ( $P < 3.3e-03$ )

**Table S5.** Effect of the seven SNPs from five loci achieving at least suggestive significance ( $PGC < 1e-05$ ) in adulthood ADHD (2,707 cases and 2,484 controls)

(a) rs10594 (GG+GC versus CC)

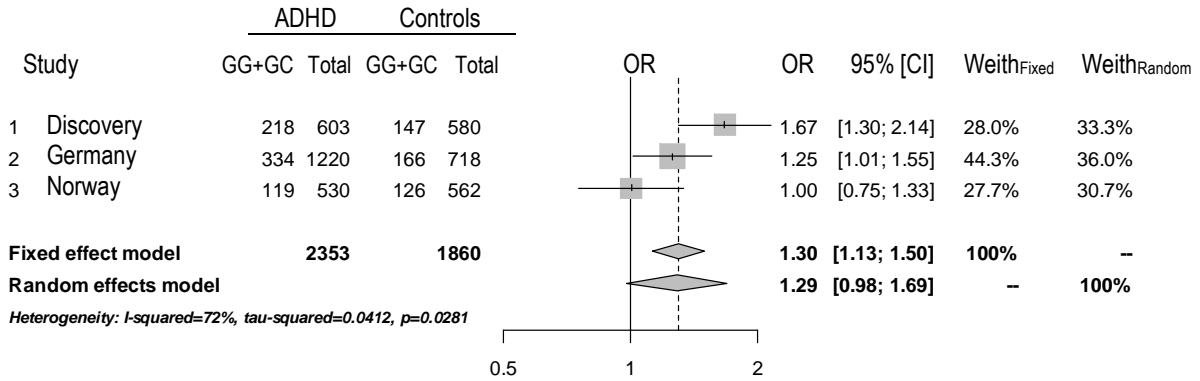

(b) rs1445594 (AA+AG versus GG)

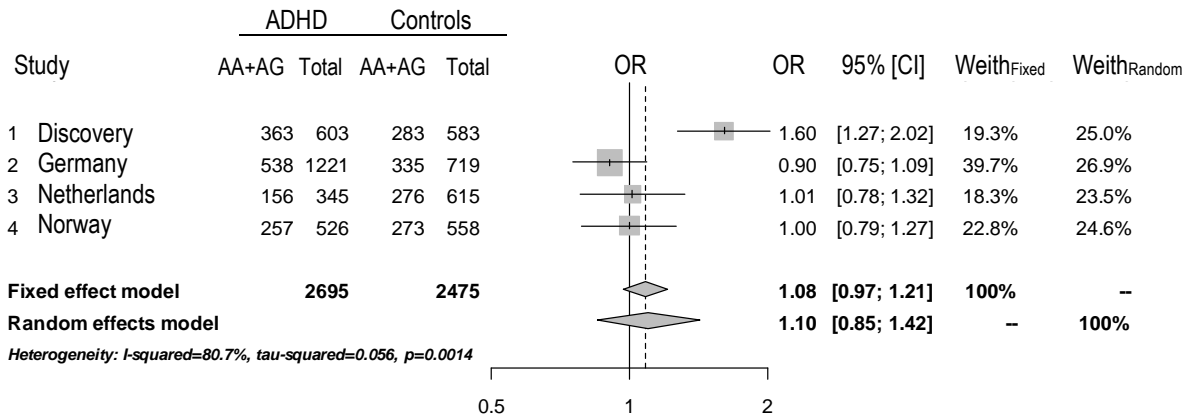

(c) rs1897792 (AA+AC versus CC)

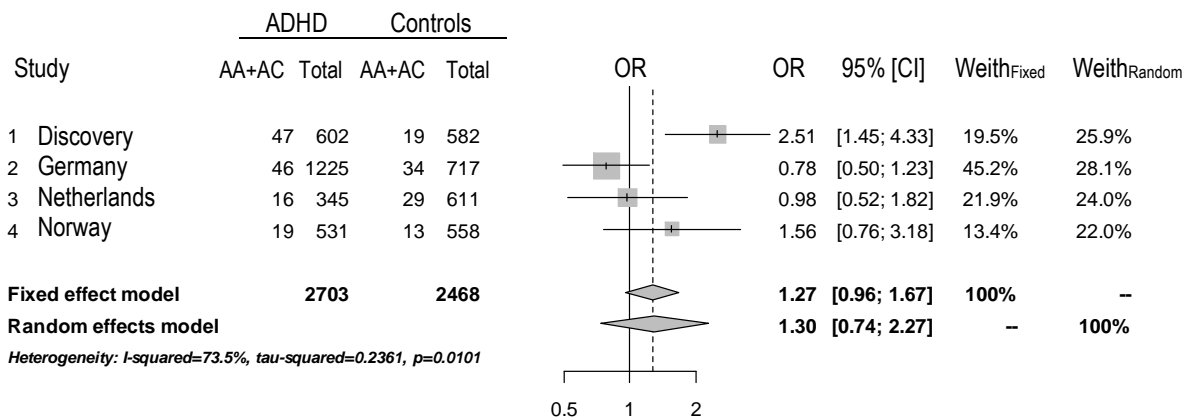

(d) rs4902569 (GG+GA versus AA)

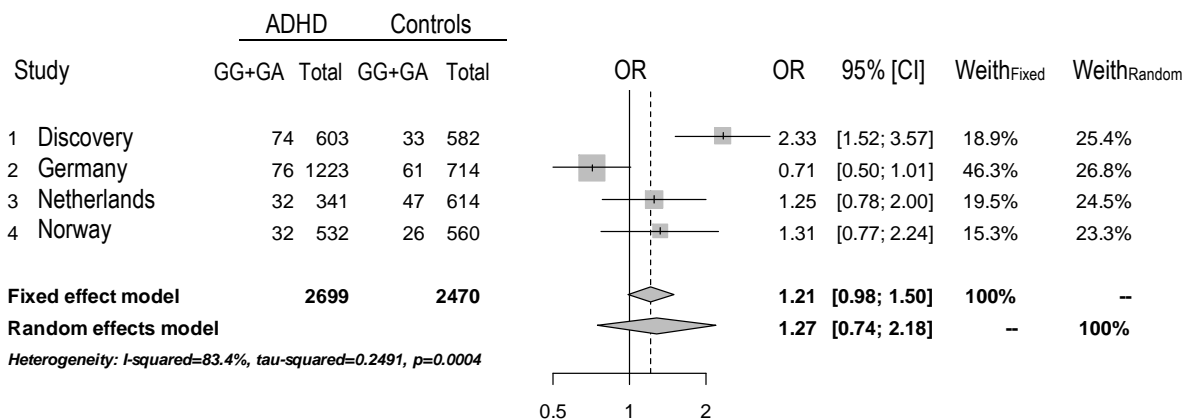

(e) rs2415545 (AA+AG versus GG)

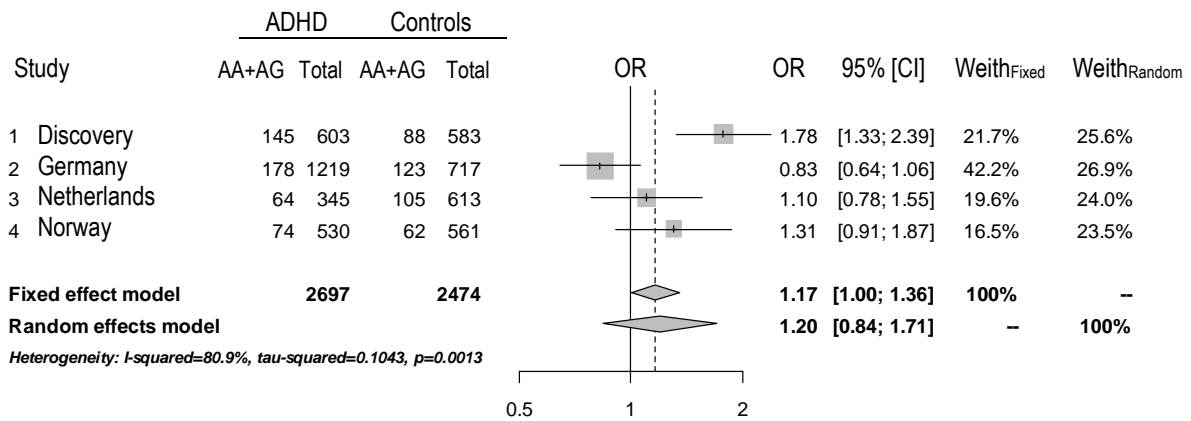

(f) rs11644983 (CC+CT versus TT)

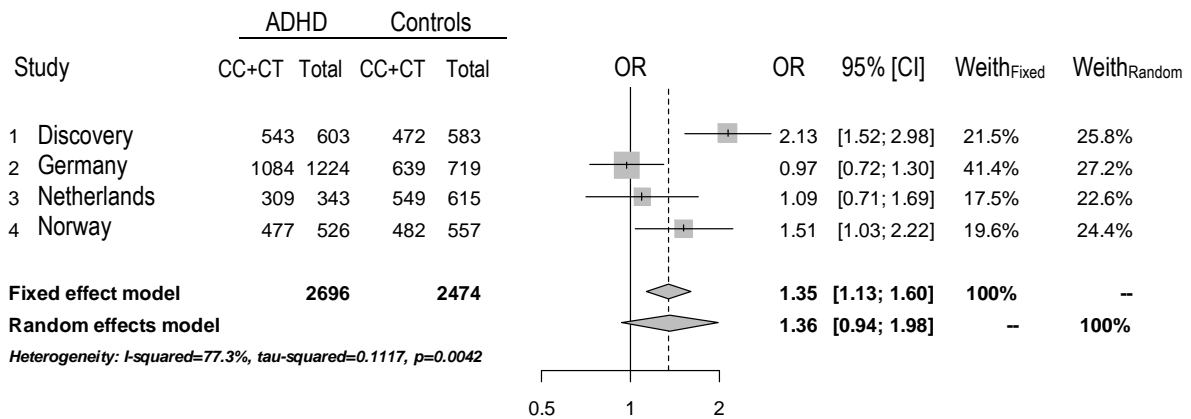

(g) rs11646443 (GG+GA versus AA)

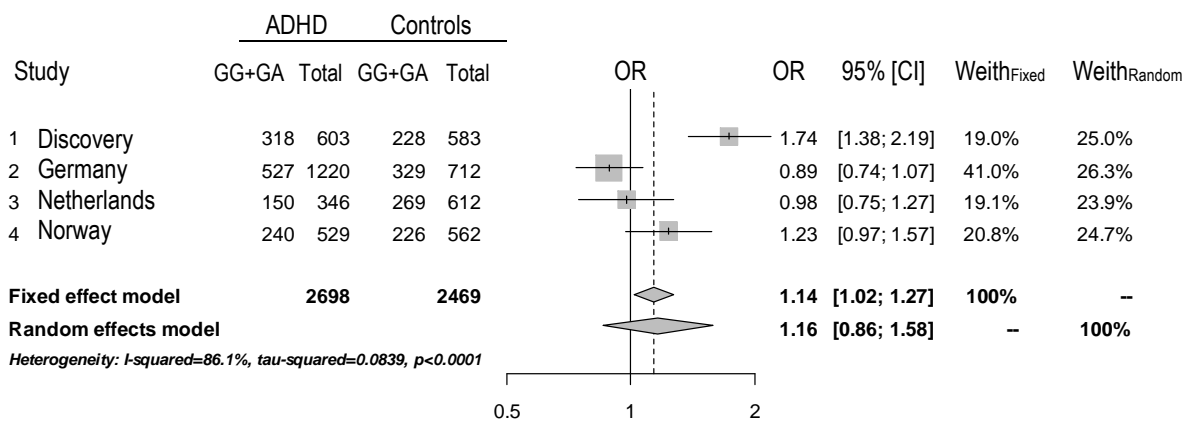

**Table S6.** Effect of the seven SNPs from four loci achieving at least suggestive significance (PGC < 1e-05) in combined ADHD (1,826 cases and 2,484 controls)

(a) rs2232429 (GG+GA versus AA)

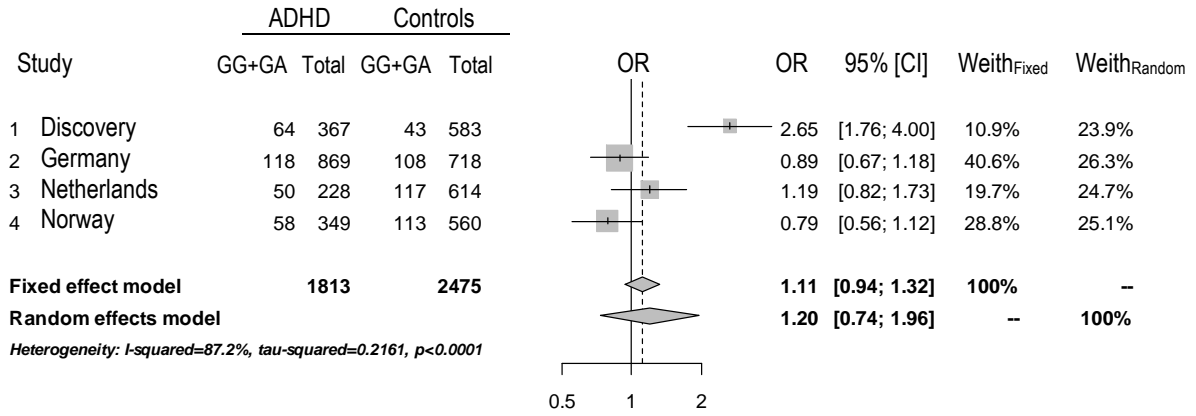

(b) rs4416909 (CC+CT versus TT)

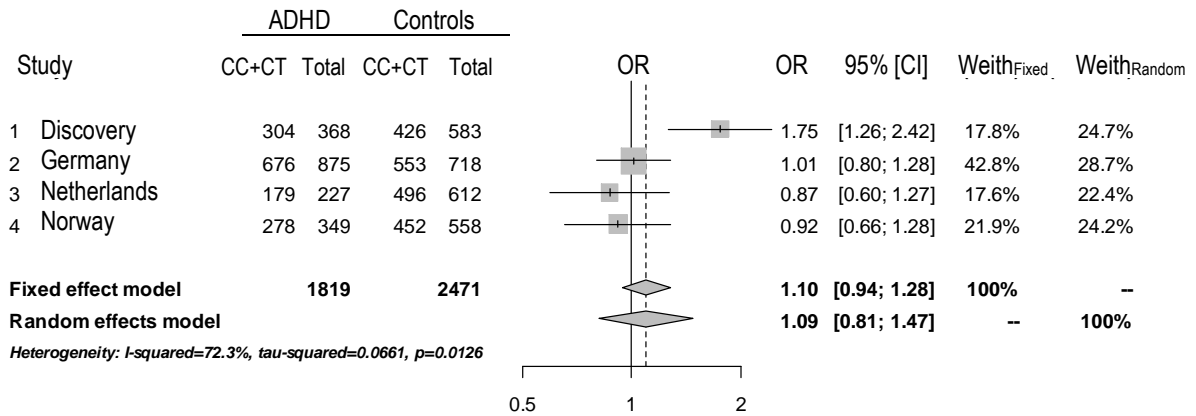

(c) rs4902569 (GG+GA versus AA)

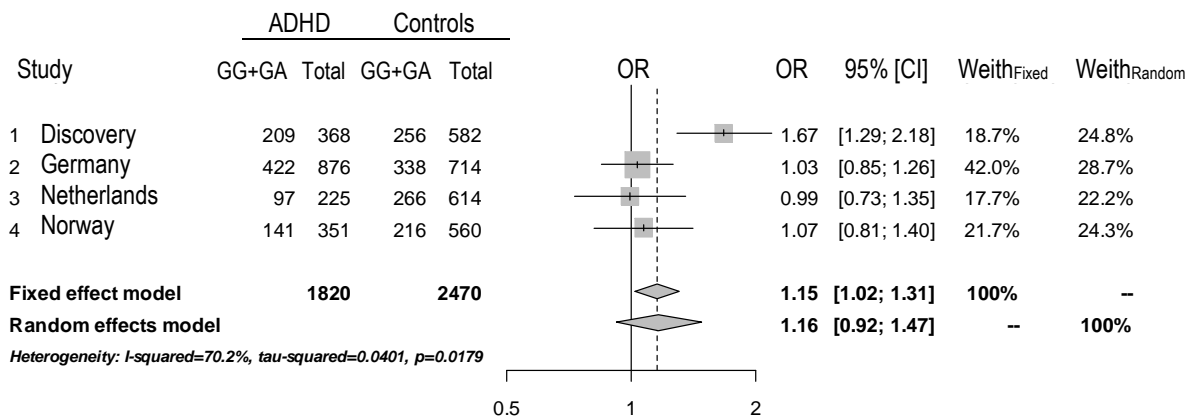

(d) rs2415543 (AA+AG versus GG)

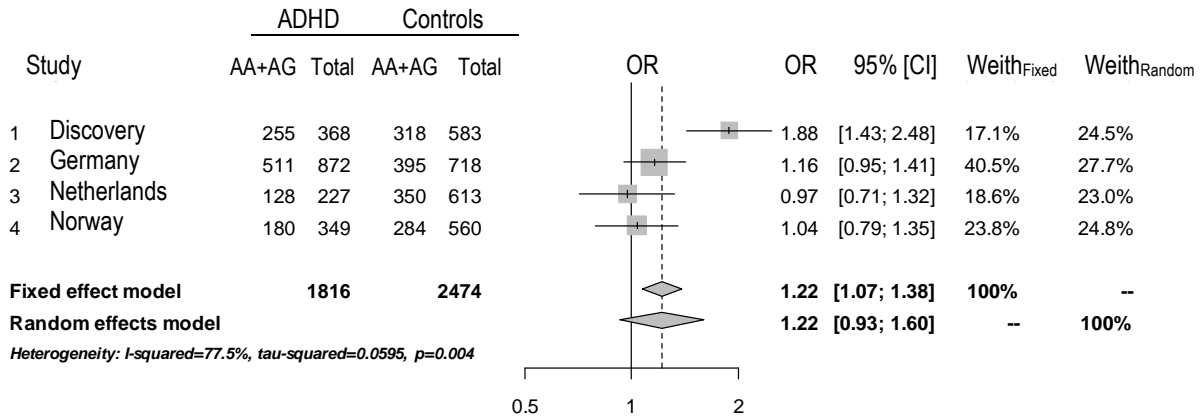

(e) rs2415545 (AA+AC versus CC)

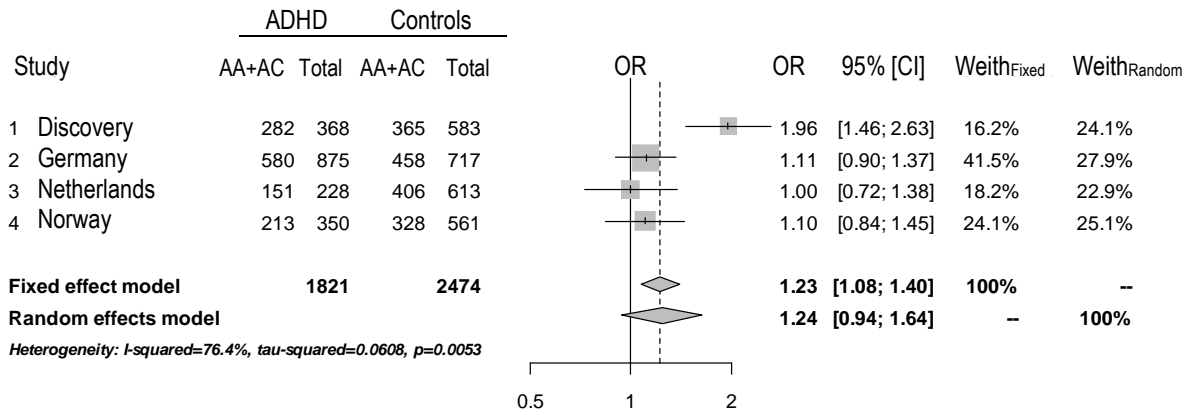

(f) rs3814860 (AA+AC versus CC)

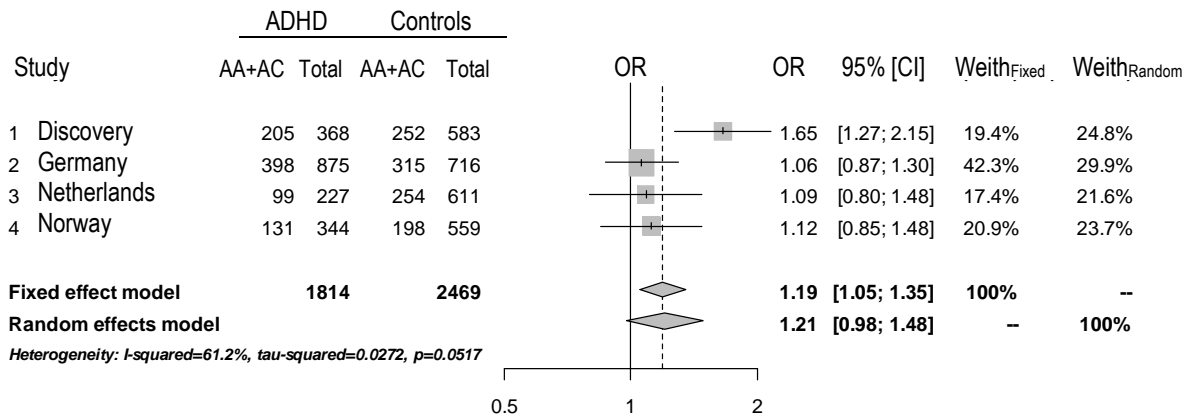

(g) rs11646443 (GG+GA versus AA)

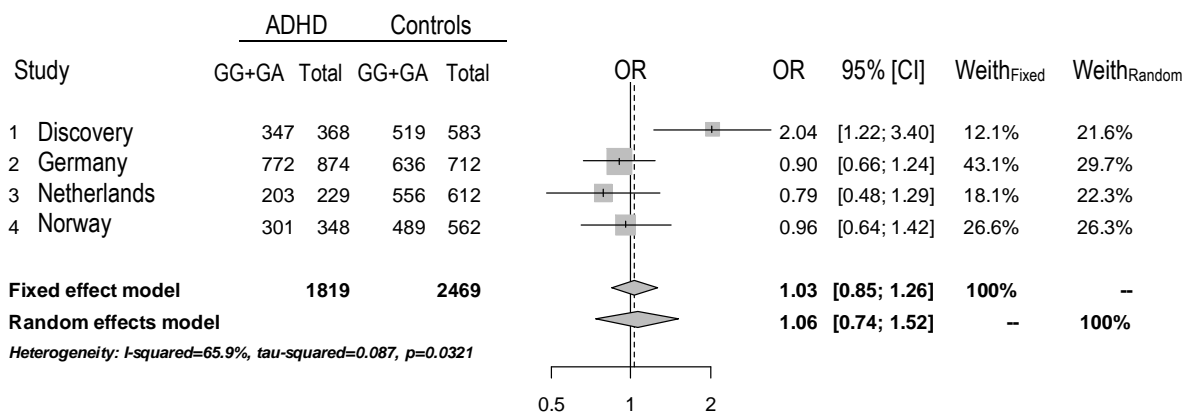



**Table S7.** Effect of the three SNPs from three loci achieving at least suggestive significance (PGC < 1e-05) on inattentive ADHD (588 cases and 2,484 controls)

(a) rs12333188 (TT+TC versus CC)

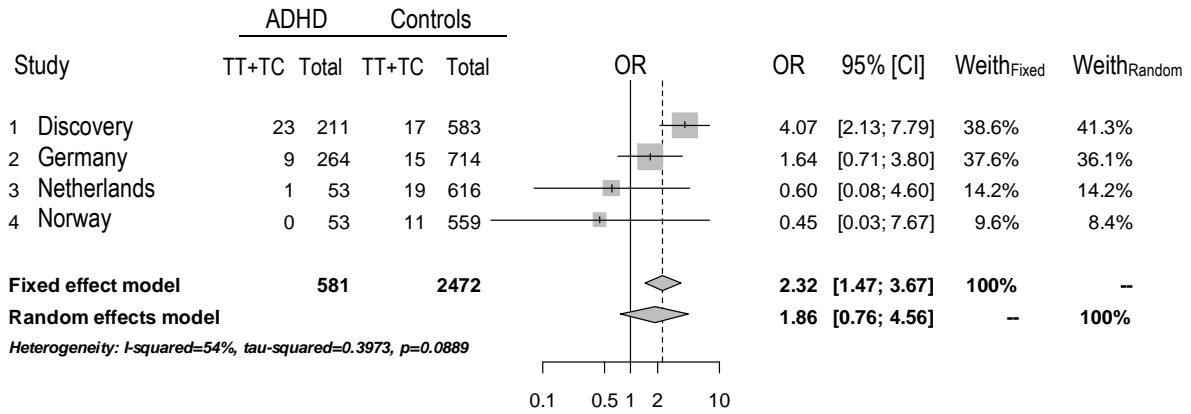

(b) rs1962749 (TT+TC versus CC)

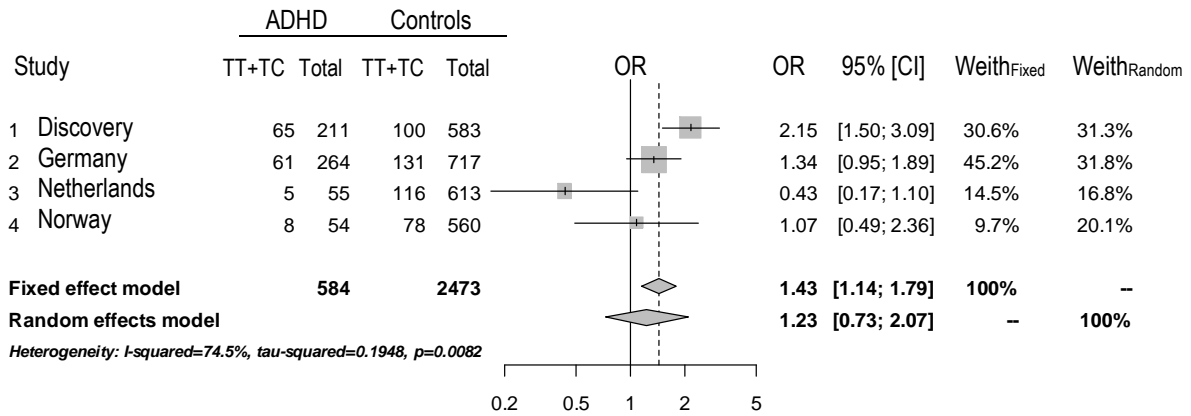

(c) rs1988353 (AA+AG versus GG)

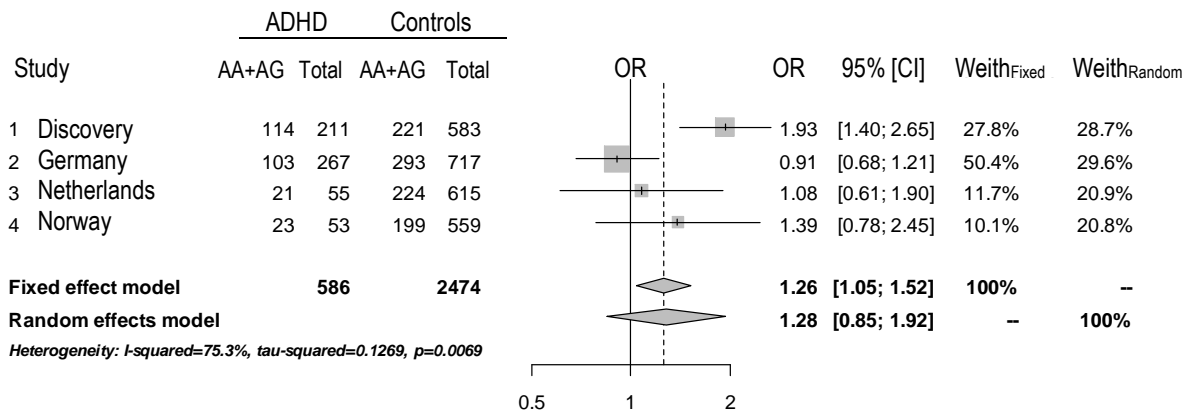

**Table S8.** Significant genotyped and imputed SNPs within the *FBXO33* locus in the discovery cohort of 368 combined ADHD patients and 583 controls

| Marker*           | Position (bp)**   | P-value         | Location         |
|-------------------|-------------------|-----------------|------------------|
| <b>rs17696574</b> | <b>39,967,531</b> | <b>2,54E-06</b> | <b>5' region</b> |
| <b>rs10143148</b> | <b>39,964,127</b> | <b>0,009422</b> | <b>5' region</b> |
| <b>rs1950330</b>  | <b>39,955,162</b> | <b>6,50E-04</b> | <b>5' region</b> |
| <b>rs2057137</b>  | <b>39,943,541</b> | <b>4,00E-04</b> | <b>5' region</b> |
| <b>rs6571939</b>  | <b>39,927,605</b> | <b>0,006254</b> | <b>5' region</b> |
| <b>rs2038281</b>  | <b>39,915,197</b> | <b>7,44E-05</b> | <b>5' region</b> |
| <b>rs2038278</b>  | <b>39,912,718</b> | <b>7,71E-06</b> | <b>5' region</b> |
| rs8006123         | 39,900,672        | 1,80E-06        | Intron 1         |
| rs2415549         | 39,899,968        | 2,82E-06        | Intron 1         |
| rs7161403         | 39,898,349        | 2,05E-06        | Intron 1         |
| rs12588110        | 39,897,797        | 1,80E-06        | Intron 1         |
| rs36090203        | 39,897,705        | 1,36E-06        | Intron 1         |
| rs34654496        | 39,897,415        | 1,36E-06        | Intron 1         |
| rs4902637         | 39,896,814        | 1,80E-06        | Intron 1         |
| rs10145949        | 39,896,656        | 9,98E-07        | Intron 1         |
| rs4902636         | 39,896,638        | 1,80E-06        | Intron 1         |
| rs71407786        | 39,894,494        | 1,90E-04        | Intron 1         |
| rs34649642        | 39,894,356        | 1,80E-06        | Intron 1         |
| rs35297616        | 39,894,204        | 1,36E-06        | Intron 1         |
| rs12588175        | 39,894,085        | 1,80E-06        | Intron 1         |
| <b>rs12590172</b> | <b>39,893,535</b> | <b>2,82E-06</b> | <b>Intron 1</b>  |
| rs12587625        | 39,893,525        | 2,82E-06        | Intron 1         |
| rs61999076        | 39,893,192        | 0,001675        | Intron 1         |
| rs56127968        | 39,892,757        | 1,93E-06        | Intron 1         |
| rs35459433        | 39,892,574        | 2,82E-06        | Intron 1         |
| rs34080511        | 39,892,197        | 5,42E-04        | Intron 1         |
| rs8003397         | 39,891,459        | 3,87E-06        | Intron 1         |
| rs8003621         | 39,891,394        | 3,63E-06        | Intron 1         |
| rs8019328         | 39,890,545        | 1,62E-06        | Intron 1         |
| rs2899889         | 39,889,812        | 6,72E-06        | Intron 1         |
| rs2899888         | 39,889,759        | 1,93E-05        | Intron 1         |
| rs4902622         | 39,888,772        | 4,42E-06        | Intron 1         |
| rs74745468        | 39,887,676        | 0,001677        | Intron 1         |
| rs12232110        | 39,887,331        | 9,02E-07        | Intron 1         |
| rs8006893         | 39,886,707        | 1,03E-06        | Intron 1         |
| rs8006321         | 39,886,381        | 2,04E-06        | Intron 1         |
| rs10139591        | 39,885,749        | 0,001675        | Intron 1         |
| rs56046902        | 39,884,876        | 2,46E-06        | Intron 1         |
| rs7152341         | 39,884,605        | 3,18E-06        | Intron 1         |
| rs10143351        | 39,882,971        | 1,22E-06        | Intron 1         |
| rs12882250        | 39,882,965        | 2,04E-06        | Intron 1         |
| rs34651350        | 39,881,184        | 1,36E-06        | Intron 1         |
| rs34785385        | 39,880,920        | 4,22E-06        | Intron 1         |
| rs35693868        | 39,880,851        | 9,56E-06        | Intron 1         |
| rs12886769        | 39,880,819        | 3,18E-06        | Intron 1         |

|                  |                   |                 |                  |
|------------------|-------------------|-----------------|------------------|
| rs4902599        | 39,880,284        | 3,63E-06        | Intron 1         |
| rs4902598        | 39,877,948        | 3,61E-06        | Intron 1         |
| rs2148507        | 39,877,232        | 1,66E-06        | Intron 1         |
| rs2415546        | 39,876,289        | 1,66E-06        | Intron 1         |
| rs12880644       | 39,876,019        | 3,61E-06        | Intron 1         |
| rs12897960       | 39,875,949        | 3,61E-06        | Intron 1         |
| rs35553183       | 39,875,672        | 3,61E-06        | Intron 1         |
| rs4899245        | 39,874,402        | 4,37E-06        | Intron 1         |
| rs147773159      | 39,873,797        | 0,01858         | Intron 1         |
| rs12885079       | 39,873,661        | 1,25E-06        | Intron 1         |
| rs79982649       | 39,873,415        | 0,008118        | Intron 1         |
| rs7142748        | 39,872,693        | 1,22E-06        | Intron 1         |
| rs72675487       | 39,872,686        | 3,63E-06        | Intron 1         |
| <b>rs3814860</b> | <b>39,868,646</b> | <b>6,35E-06</b> | <b>3'UTR</b>     |
| rs117538365      | 39,867,583        | 0,002579        | 3'UTR            |
| rs2274395        | 39,865,764        | 2,94E-06        | 3'UTR            |
| rs1056345        | 39,865,674        | 2,55E-06        | 3'UTR            |
| <b>rs2415545</b> | <b>39,863,802</b> | <b>1,91E-06</b> | <b>3' region</b> |
| <b>rs2415543</b> | <b>39,860,216</b> | <b>7,16E-06</b> | <b>3' region</b> |
| <b>rs4902569</b> | <b>39,858,941</b> | <b>5,94E-06</b> | <b>3' region</b> |

---

\*In bold, genotyped markers; \*\*Base pairs according to hg19 - NCBI Build 36

**Table S9.** GO categories reaching nominal significance ( $P < 0.05$ ) for overrepresentation in the GWAS dataset.

| GO NUMBER  | TYPE* | TOTAL GENES IN CATEGORY | GENES ON LIST | EXPECTED GENES ON LIST | P-VALUE | EXPECTED HITS/STUDY | FUNCTION                                          |
|------------|-------|-------------------------|---------------|------------------------|---------|---------------------|---------------------------------------------------|
| GO:0008366 | P     | 30                      | 21            | 12,82                  | 0,0007  | 1,68                | <b>axon ensheathment</b>                          |
| GO:0007272 | P     | 30                      | 21            | 12,82                  | 0,0007  | 1,68                | <b>ensheathment of neurons</b>                    |
| GO:0009887 | P     | 473                     | 232           | 200,56                 | 0,0009  | 2,12                | organ morphogenesis                               |
| GO:0003700 | F     | 866                     | 380           | 341,16                 | 0,001   | 2,35                | transcription factor activity                     |
| GO:0042552 | P     | 27                      | 19            | 11,36                  | 0,0012  | 2,8                 | <b>myelination</b>                                |
| GO:0048706 | P     | 53                      | 28            | 18,65                  | 0,0014  | 3,25                | embryonic skeletal system development             |
| GO:0001764 | P     | 41                      | 28            | 19,42                  | 0,0015  | 3,48                | <b>neuron migration</b>                           |
| GO:0051336 | P     | 266                     | 140           | 117,69                 | 0,0015  | 3,48                | regulation of hydrolase activity                  |
| GO:0006144 | P     | 12                      | 10            | 5,02                   | 0,0021  | 4,88                | purine base metabolic process                     |
| GO:0030225 | P     | 11                      | 10            | 5,44                   | 0,0024  | 5,59                | macrophage differentiation                        |
| GO:0030154 | P     | 1156                    | 541           | 499,76001              | 0,0028  | 6,57                | cell differentiation                              |
| GO:0048598 | P     | 207                     | 101           | 82,08                  | 0,0028  | 6,57                | embryonic morphogenesis                           |
| GO:0048704 | P     | 40                      | 21            | 13,39                  | 0,0031  | 7,31                | embryonic skeletal system morphogenesis           |
| GO:0009653 | P     | 950                     | 448           | 412,29001              | 0,0033  | 7,81                | anatomical structure morphogenesis                |
| GO:0007275 | P     | 2202                    | 992           | 940,84998              | 0,0034  | 8,06                | multicellular organismal development              |
| GO:0004540 | F     | 60                      | 31            | 21,11                  | 0,0035  | 8,32                | ribonuclease activity                             |
| GO:0001975 | P     | 7                       | 7             | 3,68                   | 0,0036  | 8,56                | response to amphetamine                           |
| GO:0008589 | P     | 10                      | 8             | 3,61                   | 0,0038  | 9,07                | regulation of smoothened signaling pathway        |
| GO:0030528 | F     | 1311                    | 555           | 513,66998              | 0,0039  | 9,34                | transcription regulator activity                  |
| GO:0021522 | P     | 11                      | 9             | 4,85                   | 0,0041  | 9,88                | <b>spinal cord motor neuron differentiation</b>   |
| GO:0048869 | P     | 1247                    | 583           | 543,13                 | 0,0045  | 10,93               | <b>cellular developmental process</b>             |
| GO:0022037 | P     | 22                      | 16            | 10,52                  | 0,0045  | 10,93               | metencephalon development                         |
| GO:0007389 | P     | 193                     | 89            | 73,2                   | 0,005   | 12,27               | pattern specification process                     |
| GO:0032502 | P     | 2821                    | 1239          | 1184,85999             | 0,0052  | 12,81               | developmental process                             |
| GO:0048522 | P     | 1229                    | 555           | 515,01001              | 0,0052  | 12,81               | positive regulation of cellular process           |
| GO:0016331 | P     | 36                      | 24            | 16,4                   | 0,0055  | 13,63               | morphogenesis of embryonic epithelium             |
| GO:0021510 | P     | 29                      | 19            | 12,49                  | 0,0055  | 13,63               | spinal cord development                           |
| GO:0048468 | P     | 548                     | 270           | 244,06                 | 0,0056  | 13,91               | cell development                                  |
| GO:0005097 | F     | 45                      | 29            | 21                     | 0,0058  | 14,47               | Rab GTPase activator activity                     |
| GO:0042391 | P     | 84                      | 51            | 40,27                  | 0,0061  | 15,31               | regulation of membrane potential                  |
| GO:0003676 | F     | 2934                    | 1078          | 1025,46997             | 0,0062  | 15,59               | nucleic acid binding                              |
| GO:0042440 | P     | 38                      | 23            | 15,6                   | 0,0064  | 16,18               | pigment metabolic process                         |
| GO:0015250 | F     | 10                      | 8             | 4,02                   | 0,0064  | 16,18               | water channel activity                            |
| GO:0051216 | P     | 46                      | 30            | 21,89                  | 0,0068  | 17,34               | cartilage development                             |
| GO:0070461 | C     | 4                       | 4             | 1,27                   | 0,0075  | 19,36               | SAGA-type complex                                 |
| GO:0042176 | P     | 25                      | 17            | 11,02                  | 0,0077  | 19,94               | regulation of protein catabolic process           |
| GO:0035239 | P     | 70                      | 42            | 32,36                  | 0,0078  | 20,23               | tube morphogenesis                                |
| GO:0009790 | P     | 377                     | 175           | 154,08                 | 0,0082  | 21,39               | embryonic development                             |
| GO:0007194 | P     | 31                      | 21            | 14,71                  | 0,0082  | 21,39               | negative regulation of adenylate cyclase activity |
| GO:0031280 | P     | 31                      | 21            | 14,71                  | 0,0082  | 21,39               | negative regulation of cyclase activity           |
| GO:0051350 | P     | 31                      | 21            | 14,71                  | 0,0082  | 21,39               | negative regulation of lyase activity             |
| GO:0007399 | P     | 776                     | 384           | 355,59                 | 0,0085  | 22,26               | <b>nervous system development</b>                 |
| GO:0046112 | P     | 10                      | 8             | 4,14                   | 0,0086  | 22,55               | nucleobase biosynthetic process                   |
| GO:0009113 | P     | 6                       | 5             | 1,83                   | 0,0087  | 22,83               | purine base biosynthetic process                  |
| GO:0055072 | P     | 25                      | 15            | 8,99                   | 0,0088  | 23,11               | iron ion homeostasis                              |
| GO:0033135 | P     | 8                       | 7             | 3,35                   | 0,0089  | 23,4                | regulation of peptidyl-serine phosphorylation     |
| GO:0032405 | F     | 6                       | 5             | 1,83                   | 0,0092  | 24,26               | MutLalpha complex binding                         |
| GO:0032313 | P     | 44                      | 28            | 20,67                  | 0,0092  | 24,26               | regulation of Rab GTPase activity                 |
| GO:0032483 | P     | 44                      | 28            | 20,67                  | 0,0092  | 24,26               | regulation of Rab protein signal transduction     |
| GO:0048856 | P     | 1888                    | 859           | 817,71997              | 0,0095  | 25,14               | anatomical structure development                  |
| GO:0051239 | P     | 597                     | 289           | 263,95999              | 0,0097  | 25,72               | regulation of multicellular organismal            |

|                   |          |            |            |               |               |              |                                                                                     |
|-------------------|----------|------------|------------|---------------|---------------|--------------|-------------------------------------------------------------------------------------|
|                   |          |            |            |               |               |              | process                                                                             |
|                   |          |            |            |               |               |              | regulation of nucleobase, nucleoside, nucleotide and nucleic acid metabolic process |
| GO:0019219        | P        | 2445       | 946        | 899,77002     | 0,0098        | 26,01        |                                                                                     |
| GO:0008016        | P        | 58         | 37         | 28,47         | 0,0098        | 26,01        | regulation of heart contraction                                                     |
| GO:0045604        | P        | 3          | 3          | 0,76          | 0,0098        | 26,01        | regulation of epidermal cell differentiation                                        |
| GO:0021515        | P        | 19         | 13         | 8,22          | 0,0099        | 26,29        | cell differentiation in spinal cord                                                 |
| <b>GO:0014020</b> | <b>P</b> | <b>19</b>  | <b>14</b>  | <b>8,93</b>   | <b>0,0101</b> | <b>26,88</b> | <b>primary neural tube formation</b>                                                |
| GO:0006572        | P        | 4          | 4          | 1,4           | 0,0102        | 27,18        | tyrosine catabolic process                                                          |
| <b>GO:0001843</b> | <b>P</b> | <b>17</b>  | <b>13</b>  | <b>8,23</b>   | <b>0,0105</b> | <b>28,06</b> | <b>neural tube closure</b>                                                          |
| <b>GO:0043025</b> | <b>C</b> | <b>62</b>  | <b>38</b>  | <b>29,48</b>  | <b>0,0107</b> | <b>28,62</b> | <b>cell soma</b>                                                                    |
| GO:0001894        | P        | 28         | 18         | 12,25         | 0,0108        | 28,9         | tissue homeostasis                                                                  |
| GO:0048871        | P        | 28         | 18         | 12,25         | 0,0108        | 28,9         | multicellular organismal homeostasis                                                |
| GO:0048705        | P        | 64         | 32         | 23,8          | 0,0108        | 28,9         | skeletal system morphogenesis                                                       |
| GO:0021517        | P        | 13         | 10         | 6,02          | 0,0108        | 28,9         | ventral spinal cord development                                                     |
| GO:0048518        | P        | 1345       | 601        | 563,64001     | 0,0109        | 29,19        | positive regulation of biological process                                           |
| GO:0048731        | P        | 1685       | 768        | 729,97998     | 0,011         | 29,48        | system development                                                                  |
| GO:0044057        | P        | 179        | 99         | 85,26         | 0,011         | 29,48        | regulation of system process                                                        |
| GO:0048878        | P        | 353        | 174        | 154,38        | 0,0111        | 29,76        | chemical homeostasis                                                                |
| GO:0006919        | P        | 42         | 25         | 17,8          | 0,0111        | 29,76        | activation of caspase activity                                                      |
| GO:0048513        | P        | 1184       | 537        | 503,70001     | 0,0112        | 30,05        | organ development                                                                   |
| GO:0007423        | P        | 151        | 74         | 60,89         | 0,0112        | 30,05        | sensory organ development                                                           |
| GO:0050482        | P        | 8          | 7          | 3,48          | 0,0112        | 30,05        | arachidonic acid secretion                                                          |
| GO:0065009        | P        | 735        | 335        | 308,22        | 0,0116        | 31,2         | regulation of molecular function                                                    |
| <b>GO:0019228</b> | <b>P</b> | <b>37</b>  | <b>24</b>  | <b>17,43</b>  | <b>0,0121</b> | <b>32,62</b> | <b>regulation of action potential in neuron</b>                                     |
| GO:0045449        | P        | 2299       | 885        | 841,41998     | 0,0122        | 32,9         | regulation of transcription                                                         |
| <b>GO:0022008</b> | <b>P</b> | <b>369</b> | <b>186</b> | <b>166,52</b> | <b>0,0123</b> | <b>33,19</b> | <b>neurogenesis</b>                                                                 |
| <b>GO:0030424</b> | <b>C</b> | <b>52</b>  | <b>35</b>  | <b>27,27</b>  | <b>0,0125</b> | <b>33,76</b> | <b>axon</b>                                                                         |
| GO:0043565        | F        | 497        | 212        | 190,34        | 0,0126        | 34,04        | sequence-specific DNA binding                                                       |
| GO:0048858        | P        | 132        | 77         | 65,47         | 0,0127        | 34,32        | cell projection morphogenesis                                                       |
| GO:0032990        | P        | 132        | 77         | 65,47         | 0,0127        | 34,32        | cell part morphogenesis                                                             |
| <b>GO:0048699</b> | <b>P</b> | <b>346</b> | <b>176</b> | <b>157,19</b> | <b>0,0128</b> | <b>34,6</b>  | <b>generation of neurons</b>                                                        |
| GO:0004521        | F        | 41         | 22         | 14,9          | 0,0128        | 34,6         | endoribonuclease activity                                                           |
| GO:0031326        | P        | 2572       | 992        | 945,92999     | 0,0129        | 34,89        | regulation of cellular biosynthetic process                                         |
|                   |          |            |            |               |               |              | regulation of transcription, DNA-dependent                                          |
| GO:0006355        | P        | 2167       | 833        | 790,40002     | 0,013         | 35,18        | positive regulation of tyrosine phosphorylation of Stat3 protein                    |
| GO:0042517        | P        | 11         | 8          | 4,03          | 0,013         | 35,18        | transcription corepressor activity                                                  |
| GO:0003714        | F        | 117        | 57         | 45,72         | 0,0131        | 35,47        | 1-alkyl-2-acetyl-glycerophosphocholine esterase activity                            |
| GO:0003847        | F        | 5          | 4          | 1,27          | 0,0133        | 36,05        | regulation of gene expression                                                       |
| GO:0010468        | P        | 2501       | 960        | 914,59998     | 0,0134        | 36,33        | neuromuscular process                                                               |
| GO:0050905        | P        | 47         | 31         | 23,73         | 0,0135        | 36,62        | adult locomotory behavior                                                           |
| GO:0008344        | P        | 32         | 22         | 15,92         | 0,0135        | 36,62        | ion homeostasis                                                                     |
| GO:0050801        | P        | 283        | 140        | 122,88        | 0,0136        | 36,91        | porphyrin metabolic process                                                         |
| GO:0006778        | P        | 24         | 16         | 10,36         | 0,0136        | 36,91        | tetrapyrrole metabolic process                                                      |
| GO:0033013        | P        | 24         | 16         | 10,36         | 0,0136        | 36,91        | regulation of RNA metabolic process                                                 |
| GO:0051252        | P        | 2190       | 840        | 797,98999     | 0,0139        | 37,78        |                                                                                     |
| <b>GO:0007409</b> | <b>P</b> | <b>119</b> | <b>70</b>  | <b>59,3</b>   | <b>0,0143</b> | <b>38,98</b> | <b>axonogenesis</b>                                                                 |
| GO:0042592        | P        | 566        | 268        | 244,53        | 0,0145        | 39,58        | homeostatic process                                                                 |
|                   |          |            |            |               |               |              | inhibition of adenylate cyclase activity by G-protein signaling pathway             |
| GO:0007193        | P        | 18         | 12         | 7,26          | 0,0146        | 39,88        | positive regulation of hydrolase activity                                           |
| GO:0051345        | P        | 137        | 73         | 60,85         | 0,0148        | 40,46        | nucleobase metabolic process                                                        |
| GO:0009112        | P        | 20         | 14         | 8,97          | 0,015         | 41,07        | midbody                                                                             |
| GO:0030496        | C        | 12         | 9          | 4,85          | 0,015         | 41,07        | regulation of biosynthetic process                                                  |
| GO:0009889        | P        | 2580       | 994        | 949,20001     | 0,0159        | 43,82        | JAK-STAT cascade                                                                    |
| GO:0007259        | P        | 30         | 19         | 13,12         | 0,0161        | 44,44        | regulation of GTPase activity                                                       |
| GO:0043087        | P        | 101        | 58         | 47,71         | 0,0165        | 45,67        | response to progesterone stimulus                                                   |
| GO:0032570        | P        | 4          | 4          | 1,55          | 0,0165        | 45,67        | structural constituent of nuclear pore                                              |
| GO:0017056        | F        | 4          | 4          | 1,58          | 0,0166        | 45,99        |                                                                                     |
| <b>GO:0030182</b> | <b>P</b> | <b>270</b> | <b>139</b> | <b>123,15</b> | <b>0,0167</b> | <b>46,3</b>  | <b>neuron differentiation</b>                                                       |
| GO:0030027        | C        | 42         | 28         | 21,36         | 0,0171        | 47,57        | lamellipodium                                                                       |
|                   |          |            |            |               |               |              | positive regulation of cellular metabolic process                                   |
| GO:0031325        | P        | 569        | 262        | 239,78999     | 0,0173        | 48,2         |                                                                                     |

|                   |          |            |           |              |               |              |                                                                             |
|-------------------|----------|------------|-----------|--------------|---------------|--------------|-----------------------------------------------------------------------------|
| GO:0006890        | P        | 18         | 12        | 7,28         | 0,0173        | 48,2         | retrograde vesicle-mediated transport, Golgi to ER                          |
| GO:0016504        | F        | 19         | 13        | 8,23         | 0,0175        | 48,82        | peptidase activator activity                                                |
| GO:0005634        | C        | 4694       | 1708      | 1656,72998   | 0,0177        | 49,44        | nucleus                                                                     |
| GO:0002573        | P        | 27         | 19        | 13,5         | 0,0178        | 49,77        | myeloid leukocyte differentiation                                           |
| GO:0042995        | C        | 427        | 230       | 210,59       | 0,0178        | 49,77        | cell projection                                                             |
| GO:0007625        | P        | 4          | 4         | 1,53         | 0,0178        | 49,77        | grooming behavior                                                           |
| GO:0003712        | F        | 297        | 136       | 119,35       | 0,018         | 50,4         | transcription cofactor activity                                             |
| GO:0042168        | P        | 19         | 13        | 8,1          | 0,0181        | 50,72        | heme metabolic process                                                      |
| GO:0040014        | P        | 44         | 24        | 17,18        | 0,0182        | 51,05        | regulation of multicellular organism growth                                 |
| GO:0043280        | P        | 47         | 27        | 20,14        | 0,0184        | 51,69        | positive regulation of caspase activity                                     |
| GO:0002246        | P        | 4          | 4         | 1,49         | 0,0188        | 52,95        | healing during inflammatory response                                        |
| GO:0031252        | C        | 80         | 48        | 39,08        | 0,0189        | 53,27        | cell leading edge                                                           |
| GO:0007164        | P        | 7          | 6         | 2,93         | 0,0189        | 53,27        | establishment of tissue polarity                                            |
| GO:0045217        | P        | 3          | 3         | 0,9          | 0,0189        | 53,27        | cell-cell junction maintenance                                              |
| GO:0034331        | P        | 3          | 3         | 0,9          | 0,0189        | 53,27        | cell junction maintenance                                                   |
| GO:0043954        | P        | 3          | 3         | 0,9          | 0,0189        | 53,27        | cellular component maintenance                                              |
| GO:0000124        | C        | 3          | 3         | 0,84         | 0,0189        | 53,27        | SAGA complex                                                                |
| <b>GO:0043005</b> | <b>C</b> | <b>121</b> | <b>75</b> | <b>64,59</b> | <b>0,0192</b> | <b>54,23</b> | <b>neuron projection</b>                                                    |
| <b>GO:0021548</b> | <b>P</b> | <b>4</b>   | <b>4</b>  | <b>1,76</b>  | <b>0,0192</b> | <b>54,23</b> | <b>pons development</b>                                                     |
| GO:0032446        | P        | 87         | 43        | 33,72        | 0,0195        | 55,2         | protein modification by small protein conjugation                           |
| GO:0009615        | P        | 93         | 39        | 29,8         | 0,0197        | 55,83        | response to virus                                                           |
| GO:0001736        | P        | 5          | 5         | 2,42         | 0,0202        | 57,45        | establishment of planar polarity                                            |
| GO:0048148        | P        | 6          | 6         | 3,24         | 0,0208        | 59,41        | behavioral response to cocaine                                              |
| GO:0033138        | P        | 7          | 6         | 2,97         | 0,021         | 60,07        | positive regulation of peptidyl-serine phosphorylation                      |
| GO:0030326        | P        | 55         | 32        | 24,98        | 0,0211        | 60,4         | embryonic limb morphogenesis                                                |
| GO:0035113        | P        | 55         | 32        | 24,98        | 0,0211        | 60,4         | embryonic appendage morphogenesis                                           |
| GO:0007009        | P        | 12         | 9         | 5,25         | 0,0211        | 60,4         | plasma membrane organization                                                |
| GO:0043014        | F        | 4          | 4         | 1,58         | 0,0212        | 60,74        | alpha-tubulin binding                                                       |
| GO:0009893        | P        | 590        | 271       | 249,25999    | 0,0217        | 62,41        | positive regulation of metabolic process                                    |
| GO:0002029        | P        | 5          | 4         | 1,5          | 0,0218        | 62,75        | desensitization of G-protein coupled receptor protein signaling pathway     |
| GO:0022401        | P        | 5          | 4         | 1,5          | 0,0218        | 62,75        | adaptation of signaling pathway                                             |
| GO:0035295        | P        | 126        | 69        | 58,1         | 0,0219        | 63,08        | tube development                                                            |
| GO:0019902        | F        | 30         | 21        | 15,45        | 0,022         | 63,44        | phosphatase binding                                                         |
| GO:0001601        | F        | 3          | 3         | 0,96         | 0,0221        | 63,77        | peptide YY receptor activity                                                |
| GO:0007267        | P        | 537        | 258       | 236,97       | 0,0225        | 65,14        | cell-cell signaling                                                         |
| GO:0046717        | P        | 10         | 8         | 4,55         | 0,0226        | 65,49        | acid secretion                                                              |
| GO:0005246        | F        | 13         | 10        | 6,38         | 0,0226        | 65,49        | calcium channel regulator activity                                          |
| GO:0043009        | P        | 198        | 92        | 79,22        | 0,0227        | 65,81        | chordate embryonic development                                              |
| <b>GO:0007219</b> | <b>P</b> | <b>44</b>  | <b>27</b> | <b>20,68</b> | <b>0,0229</b> | <b>66,5</b>  | <b>Notch signaling pathway</b>                                              |
| GO:0002028        | P        | 9          | 8         | 4,73         | 0,023         | 66,85        | regulation of sodium ion transport                                          |
| GO:0016567        | P        | 80         | 40        | 31,29        | 0,023         | 66,85        | protein ubiquitination                                                      |
| GO:0005372        | F        | 11         | 8         | 4,47         | 0,0233        | 67,87        | water transporter activity                                                  |
| GO:0043393        | P        | 21         | 15        | 10,4         | 0,0234        | 68,2         | regulation of protein binding                                               |
| <b>GO:0048812</b> | <b>P</b> | <b>126</b> | <b>73</b> | <b>63</b>    | <b>0,0236</b> | <b>68,88</b> | <b>neuron projection morphogenesis</b>                                      |
| GO:0009792        | P        | 201        | 93        | 80,26        | 0,0238        | 69,57        | embryonic development ending in birth or egg hatching                       |
| GO:0046483        | P        | 81         | 45        | 36,31        | 0,024         | 70,24        | heterocycle metabolic process                                               |
| GO:0051926        | P        | 7          | 6         | 3,12         | 0,0242        | 70,91        | negative regulation of calcium ion transport                                |
| GO:0006350        | P        | 1506       | 576       | 543,90002    | 0,0243        | 71,26        | transcription                                                               |
| GO:0045744        | P        | 8          | 6         | 2,9          | 0,0243        | 71,26        | negative regulation of G-protein coupled receptor protein signaling pathway |
| GO:0007626        | P        | 209        | 99        | 86,15        | 0,0243        | 71,26        | locomotory behavior                                                         |
| GO:0052548        | P        | 61         | 33        | 25,75        | 0,0243        | 71,26        | regulation of endopeptidase activity                                        |
| <b>GO:0048667</b> | <b>P</b> | <b>128</b> | <b>74</b> | <b>64,08</b> | <b>0,0244</b> | <b>71,59</b> | <b>cell morphogenesis involved in neuron differentiation</b>                |
| GO:0008283        | P        | 307        | 144       | 128,39999    | 0,0248        | 72,93        | cell proliferation                                                          |
| GO:0043558        | P        | 3          | 3         | 0,87         | 0,0252        | 74,24        | regulation of translational initiation in response to stress                |
| GO:0043555        | P        | 3          | 3         | 0,87         | 0,0252        | 74,24        | regulation of translation in response to stress                             |

|                   |          |           |           |              |               |               |                                                                                              |
|-------------------|----------|-----------|-----------|--------------|---------------|---------------|----------------------------------------------------------------------------------------------|
| GO:0007492        | P        | 12        | 9         | 5,36         | 0,0253        | 74,58         | endoderm development                                                                         |
| GO:0015721        | P        | 6         | 6         | 3,4          | 0,0254        | 74,92         | bile acid and bile salt transport                                                            |
| GO:0010556        | P        | 2485      | 948       | 908,07001    | 0,0255        | 75,25         | regulation of macromolecule biosynthetic process                                             |
| GO:0000305        | P        | 6         | 5         | 2,34         | 0,0263        | 77,91         | response to oxygen radical                                                                   |
| GO:0004904        | F        | 4         | 4         | 1,64         | 0,0264        | 78,23         | interferon receptor activity                                                                 |
| GO:0019961        | F        | 4         | 4         | 1,64         | 0,0264        | 78,23         | interferon binding                                                                           |
| GO:0055117        | P        | 5         | 5         | 2,58         | 0,0267        | 79,25         | regulation of cardiac muscle contraction                                                     |
| GO:0035108        | P        | 62        | 36        | 28,87        | 0,027         | 80,22         | limb morphogenesis                                                                           |
| GO:0035107        | P        | 62        | 36        | 28,87        | 0,027         | 80,22         | appendage morphogenesis                                                                      |
| GO:0009124        | P        | 22        | 14        | 9,31         | 0,0271        | 80,55         | nucleoside monophosphate biosynthetic process                                                |
| GO:0009123        | P        | 22        | 14        | 9,31         | 0,0271        | 80,55         | nucleoside monophosphate metabolic process                                                   |
| GO:0030126        | C        | 10        | 7         | 3,52         | 0,0272        | 80,88         | COPI vesicle coat                                                                            |
| GO:0030663        | C        | 10        | 7         | 3,52         | 0,0272        | 80,88         | COPI coated vesicle membrane                                                                 |
| GO:0000122        | P        | 181       | 88        | 76,08        | 0,0273        | 81,21         | negative regulation of transcription from RNA polymerase II promoter                         |
| GO:0045822        | P        | 4         | 3         | 0,91         | 0,0275        | 81,85         | negative regulation of heart contraction                                                     |
| GO:0009168        | P        | 16        | 10        | 5,91         | 0,0276        | 82,18         | purine ribonucleoside monophosphate biosynthetic process                                     |
| GO:0009127        | P        | 16        | 10        | 5,91         | 0,0276        | 82,18         | purine nucleoside monophosphate biosynthetic process                                         |
| GO:0009167        | P        | 16        | 10        | 5,91         | 0,0276        | 82,18         | purine ribonucleoside monophosphate metabolic process                                        |
| GO:0009126        | P        | 16        | 10        | 5,91         | 0,0276        | 82,18         | purine nucleoside monophosphate metabolic process                                            |
| GO:0006833        | P        | 13        | 9         | 5,28         | 0,0279        | 83,14         | water transport                                                                              |
| GO:0042044        | P        | 13        | 9         | 5,28         | 0,0279        | 83,14         | fluid transport                                                                              |
| GO:0033018        | C        | 5         | 5         | 2,58         | 0,0279        | 83,14         | sarcoplasmic reticulum lumen                                                                 |
| GO:0005911        | C        | 146       | 80        | 69,33        | 0,0283        | 84,45         | cell-cell junction                                                                           |
| GO:0003002        | P        | 148       | 63        | 52,55        | 0,0284        | 84,76         | regionalization                                                                              |
| GO:0045932        | P        | 8         | 6         | 3,27         | 0,0284        | 84,76         | negative regulation of muscle contraction                                                    |
| GO:0000904        | P        | 145       | 81        | 70,83        | 0,0285        | 85,09         | cell morphogenesis involved in differentiation                                               |
| GO:0001838        | P        | 25        | 16        | 11,11        | 0,0289        | 86,4          | embryonic epithelial tube formation                                                          |
| GO:0015802        | P        | 4         | 4         | 1,8          | 0,0292        | 87,4          | basic amino acid transport                                                                   |
| GO:0055082        | P        | 266       | 129       | 114,7        | 0,0293        | 87,74         | cellular chemical homeostasis                                                                |
| <b>GO:0030426</b> | <b>C</b> | <b>27</b> | <b>19</b> | <b>14,08</b> | <b>0,0295</b> | <b>88,41</b>  | <b>growth cone</b>                                                                           |
| GO:0042789        | P        | 3         | 3         | 1,07         | 0,0295        | 88,41         | mRNA transcription from RNA polymerase II promoter                                           |
| GO:0046148        | P        | 32        | 18        | 12,69        | 0,0297        | 89,07         | pigment biosynthetic process                                                                 |
| GO:0008134        | F        | 419       | 189       | 171,64       | 0,0301        | 90,41         | transcription factor binding                                                                 |
| GO:0043073        | C        | 13        | 9         | 5,29         | 0,0303        | 91,07         | germ cell nucleus                                                                            |
| GO:0002262        | P        | 3         | 3         | 0,99         | 0,0309        | 93,11         | myeloid cell homeostasis                                                                     |
| GO:0032318        | P        | 89        | 51        | 42,53        | 0,031         | 93,44         | regulation of Ras GTPase activity                                                            |
| GO:0016323        | C        | 143       | 85        | 74,65        | 0,0314        | 94,8          | basolateral plasma membrane                                                                  |
| GO:0051927        | P        | 3         | 3         | 0,97         | 0,0316        | 95,49         | negative regulation of calcium ion transport via voltage-gated calcium channel activity      |
| GO:0045935        | P        | 421       | 195       | 177,73       | 0,0317        | 95,84         | positive regulation of nucleobase, nucleoside, nucleotide and nucleic acid metabolic process |
| GO:0014075        | P        | 10        | 8         | 5,09         | 0,0319        | 96,54         | response to amine stimulus                                                                   |
| GO:0010243        | P        | 10        | 8         | 5,09         | 0,0319        | 96,54         | response to organic nitrogen                                                                 |
| GO:0003677        | F        | 2127      | 793       | 758,60999    | 0,0328        | 99,65         | DNA binding                                                                                  |
| GO:0006873        | P        | 261       | 126       | 112,26       | 0,0328        | 99,65         | cellular ion homeostasis                                                                     |
| GO:0045941        | P        | 392       | 182       | 165,39       | 0,0329        | 99,99         | positive regulation of transcription                                                         |
| GO:0010740        | P        | 138       | 65        | 54,69        | 0,0331        | 100,68        | positive regulation of protein kinase cascade                                                |
| <b>GO:0048485</b> | <b>P</b> | <b>3</b>  | <b>3</b>  | <b>1,09</b>  | <b>0,0334</b> | <b>101,71</b> | <b>sympathetic nervous system development</b>                                                |
| GO:0000303        | P        | 5         | 4         | 1,61         | 0,0335        | 102,06        | response to superoxide                                                                       |
| GO:0016192        | P        | 469       | 227       | 208,85001    | 0,0342        | 104,43        | vesicle-mediated transport                                                                   |
| GO:0051704        | P        | 504       | 209       | 190,78       | 0,0342        | 104,43        | multi-organism process                                                                       |

|                   |          |             |             |                   |               |               |                                                                         |
|-------------------|----------|-------------|-------------|-------------------|---------------|---------------|-------------------------------------------------------------------------|
| GO:0017134        | F        | 5           | 4           | 1,61              | 0,0345        | 105,46        | fibroblast growth factor binding                                        |
| GO:0006885        | P        | 26          | 16          | 11,2              | 0,0353        | 108,2         | regulation of pH                                                        |
| <b>GO:0019226</b> | <b>P</b> | <b>277</b>  | <b>149</b>  | <b>135,77</b>     | <b>0,0354</b> | <b>108,54</b> | <b>transmission of nerve impulse</b>                                    |
| GO:0044445        | C        | 129         | 49          | 39,7              | 0,0356        | 109,23        | cytosolic part                                                          |
| GO:0060173        | P        | 64          | 37          | 30,15             | 0,0358        | 109,9         | limb development                                                        |
| GO:0048736        | P        | 64          | 37          | 30,15             | 0,0358        | 109,9         | appendage development                                                   |
| GO:0010604        | P        | 558         | 255         | 236,22            | 0,036         | 110,59        | positive regulation of macromolecule metabolic process                  |
| <b>GO:0021871</b> | <b>P</b> | <b>6</b>    | <b>5</b>    | <b>2,53</b>       | <b>0,0364</b> | <b>111,95</b> | <b>forebrain regionalization</b>                                        |
| GO:0032965        | P        | 5           | 4           | 1,64              | 0,0365        | 112,29        | regulation of collagen biosynthetic process                             |
| GO:0010628        | P        | 402         | 186         | 169,74001         | 0,0369        | 113,68        | positive regulation of gene expression                                  |
| GO:0016505        | F        | 16          | 11          | 7,17              | 0,0371        | 114,37        | apoptotic protease activator activity                                   |
| <b>GO:0021695</b> | <b>P</b> | <b>14</b>   | <b>10</b>   | <b>6,73</b>       | <b>0,0372</b> | <b>114,72</b> | <b>cerebellar cortex development</b>                                    |
| GO:0009156        | P        | 21          | 13          | 8,71              | 0,0372        | 114,72        | ribonucleoside monophosphate biosynthetic process                       |
| GO:0009161        | P        | 21          | 13          | 8,71              | 0,0372        | 114,72        | ribonucleoside monophosphate metabolic process                          |
| GO:0007260        | P        | 6           | 5           | 2,43              | 0,0382        | 118,2         | tyrosine phosphorylation of STAT protein                                |
| GO:0060043        | P        | 7           | 6           | 3,41              | 0,0382        | 118,2         | regulation of cardiac muscle cell proliferation                         |
| GO:0051864        | F        | 3           | 3           | 1,08              | 0,0385        | 119,26        | histone demethylase activity (H3-K36 specific)                          |
| GO:0004518        | F        | 141         | 61          | 50,93             | 0,0388        | 120,35        | nuclease activity                                                       |
| GO:0052547        | P        | 65          | 34          | 27,23             | 0,0391        | 121,42        | regulation of peptidase activity                                        |
| GO:0070198        | P        | 5           | 4           | 1,81              | 0,0392        | 121,78        | protein localization to chromosome, telomeric region                    |
| GO:0050790        | P        | 653         | 292         | 272,04001         | 0,0398        | 123,94        | regulation of catalytic activity                                        |
| GO:0022612        | P        | 7           | 6           | 3,48              | 0,0406        | 126,91        | gland morphogenesis                                                     |
| GO:0006928        | P        | 351         | 174         | 159,33            | 0,0411        | 128,8         | cellular component movement                                             |
| GO:0051674        | P        | 351         | 174         | 159,33            | 0,0411        | 128,8         | localization of cell                                                    |
| GO:0001654        | P        | 87          | 44          | 36,38             | 0,0413        | 129,55        | eye development                                                         |
| GO:0048568        | P        | 34          | 21          | 15,99             | 0,0414        | 129,92        | embryonic organ development                                             |
| GO:0030277        | P        | 3           | 3           | 1,07              | 0,0414        | 129,92        | maintenance of gastrointestinal epithelium                              |
| GO:0043492        | F        | 93          | 58          | 50,41             | 0,0415        | 130,29        | ATPase activity, coupled to movement of substances                      |
| GO:0030802        | P        | 76          | 42          | 34,89             | 0,0419        | 131,8         | regulation of cyclic nucleotide biosynthetic process                    |
| GO:0030808        | P        | 76          | 42          | 34,89             | 0,0419        | 131,8         | regulation of nucleotide biosynthetic process                           |
| <b>GO:0032501</b> | <b>P</b> | <b>3327</b> | <b>1390</b> | <b>1350,44995</b> | <b>0,042</b>  | <b>132,18</b> | <b>multicellular organismal process</b>                                 |
| GO:0001841        | P        | 24          | 15          | 10,63             | 0,042         | 132,18        | neural tube formation                                                   |
| GO:0019222        | P        | 2947        | 1129        | 1090,68994        | 0,0422        | 132,95        | regulation of metabolic process                                         |
| GO:0005160        | F        | 17          | 12          | 8,34              | 0,0424        | 133,72        | transforming growth factor beta receptor binding                        |
| GO:0006942        | P        | 15          | 10          | 6,34              | 0,0425        | 134,09        | regulation of striated muscle contraction                               |
| GO:0045597        | P        | 145         | 78          | 68,17             | 0,0426        | 134,47        | positive regulation of cell differentiation                             |
| <b>GO:0008066</b> | <b>F</b> | <b>29</b>   | <b>25</b>   | <b>21,4</b>       | <b>0,0436</b> | <b>138,25</b> | <b>glutamate receptor activity</b>                                      |
| GO:0060255        | P        | 2810        | 1073        | 1036,18005        | 0,0439        | 139,4         | regulation of macromolecule metabolic process                           |
| <b>GO:0051240</b> | <b>P</b> | <b>128</b>  | <b>68</b>   | <b>58,71</b>      | <b>0,044</b>  | <b>139,79</b> | <b>positive regulation of multicellular organismal process</b>          |
| GO:0006937        | P        | 49          | 27          | 21,27             | 0,044         | 139,79        | regulation of muscle contraction                                        |
| GO:0045666        | P        | 15          | 9           | 5,49              | 0,044         | 139,79        | positive regulation of neuron differentiation                           |
| <b>GO:0022601</b> | <b>P</b> | <b>3</b>    | <b>3</b>    | <b>1,21</b>       | <b>0,0442</b> | <b>140,54</b> | <b>menstrual cycle phase</b>                                            |
| GO:0004983        | F        | 8           | 6           | 3,17              | 0,0442        | 140,54        | neuropeptide Y receptor activity                                        |
| <b>GO:0000149</b> | <b>F</b> | <b>23</b>   | <b>15</b>   | <b>10,89</b>      | <b>0,0446</b> | <b>142,05</b> | <b>SNARE binding</b>                                                    |
| GO:0032002        | C        | 3           | 3           | 1,23              | 0,0451        | 143,98        | interleukin-28 receptor complex                                         |
| GO:0045892        | P        | 250         | 114         | 101,85            | 0,0453        | 144,75        | negative regulation of transcription, DNA-dependent                     |
| GO:0032451        | F        | 7           | 5           | 2,36              | 0,0453        | 144,75        | demethylase activity                                                    |
| GO:0008109        | F        | 3           | 3           | 1,18              | 0,0453        | 144,75        | N-acetyllactosaminide beta-1,6-N-acetylglucosaminyltransferase activity |
| GO:0051383        | P        | 4           | 4           | 1,89              | 0,0454        | 145,13        | kinetochore organization                                                |



|            |   |      |      |            |        |        |                                                                                                |
|------------|---|------|------|------------|--------|--------|------------------------------------------------------------------------------------------------|
| GO:0030162 | P | 32   | 18   | 13,08      | 0,0455 | 145,52 | regulation of proteolysis                                                                      |
| GO:0005913 | C | 18   | 14   | 10,35      | 0,0455 | 145,52 | cell-cell adherens junction                                                                    |
| GO:0016820 | F | 95   | 59   | 51,54      | 0,0456 | 145,9  | hydrolase activity, acting on acid anhydrides, catalyzing transmembrane movement of substances |
| GO:0005581 | C | 33   | 26   | 21,57      | 0,0456 | 145,9  | collagen                                                                                       |
| GO:0008156 | P | 25   | 13   | 8,67       | 0,0462 | 148,24 | negative regulation of DNA replication                                                         |
| GO:0048703 | P | 4    | 4    | 2,09       | 0,0463 | 148,62 | embryonic viscerocranium morphogenesis                                                         |
| GO:0032092 | P | 5    | 5    | 2,8        | 0,0465 | 149,38 | positive regulation of protein binding                                                         |
| GO:0016892 | F | 18   | 9    | 5,45       | 0,0465 | 149,38 | endoribonuclease activity, producing 3'-phosphomonoesters                                      |
| GO:0032635 | P | 4    | 4    | 1,88       | 0,0465 | 149,38 | interleukin-6 production                                                                       |
| GO:0042626 | F | 92   | 57   | 49,67      | 0,0468 | 150,53 | ATPase activity, coupled to transmembrane movement of substances                               |
| GO:0043266 | P | 6    | 6    | 3,62       | 0,0468 | 150,53 | regulation of potassium ion transport                                                          |
| GO:0051384 | P | 22   | 14   | 10,04      | 0,0469 | 150,91 | response to glucocorticoid stimulus                                                            |
| GO:0034404 | P | 12   | 8    | 4,83       | 0,0472 | 152,06 | nucleobase, nucleoside and nucleotide biosynthetic process                                     |
| GO:0034654 | P | 12   | 8    | 4,83       | 0,0472 | 152,06 | nucleobase, nucleoside, nucleotide and nucleic acid biosynthetic process                       |
| GO:0005655 | C | 6    | 5    | 2,54       | 0,0473 | 152,44 | nucleolar ribonuclease P complex                                                               |
| GO:0030681 | C | 6    | 5    | 2,54       | 0,0473 | 152,44 | multimeric ribonuclease P complex                                                              |
| GO:0030677 | C | 6    | 5    | 2,54       | 0,0473 | 152,44 | ribonuclease P complex                                                                         |
| GO:0002248 | P | 3    | 3    | 1,11       | 0,0474 | 152,83 | connective tissue replacement during inflammatory response                                     |
| GO:0050793 | P | 1006 | 453  | 429,35999  | 0,0475 | 153,21 | regulation of developmental process                                                            |
| GO:0030799 | P | 78   | 43   | 36,08      | 0,0476 | 153,59 | regulation of cyclic nucleotide metabolic process                                              |
| GO:0030427 | C | 28   | 19   | 14,49      | 0,0476 | 153,59 | site of polarized growth                                                                       |
| GO:0019003 | F | 8    | 6    | 3,26       | 0,0477 | 153,99 | GDP binding                                                                                    |
| GO:0010742 | P | 5    | 5    | 3,07       | 0,0479 | 154,76 | macrophage derived foam cell differentiation                                                   |
| GO:0008656 | F | 14   | 10   | 6,58       | 0,0482 | 155,9  | caspase activator activity                                                                     |
| GO:0016477 | P | 186  | 92   | 81,45      | 0,0483 | 156,28 | cell migration                                                                                 |
| GO:0006357 | P | 537  | 235  | 217,61     | 0,0484 | 156,66 | regulation of transcription from RNA polymerase II promoter                                    |
| GO:0031328 | P | 479  | 219  | 202,53999  | 0,0485 | 157,04 | positive regulation of cellular biosynthetic process                                           |
| GO:0031323 | P | 2813 | 1076 | 1040,51001 | 0,0488 | 158,16 | regulation of cellular metabolic process                                                       |
| GO:0006465 | P | 8    | 6    | 3,47       | 0,0494 | 160,44 | signal peptide processing                                                                      |
| GO:0043502 | P | 7    | 6    | 3,42       | 0,0495 | 160,82 | regulation of muscle adaptation                                                                |
| GO:0004519 | F | 83   | 38   | 30,56      | 0,0495 | 160,82 | endonuclease activity                                                                          |
| GO:0042472 | P | 39   | 18   | 12,88      | 0,0497 | 161,58 | inner ear morphogenesis                                                                        |
| GO:0048532 | P | 5    | 4    | 1,86       | 0,0499 | 162,36 | anatomical structure arrangement                                                               |

\*In bold, gene set/pathway related with neuronal development, differentiation and activity; \*\*F: Function, P: Process, C: Cellular.

**Table S10.** P-value and OR of SNPs achieving the significance threshold of 1e-05 in four previous GWAS

| SNP        | Chr | Base pairs** | Nearest gene | Risk allele | Childhood ADHD |      |            |      | Adulthood ADHD |      |              |
|------------|-----|--------------|--------------|-------------|----------------|------|------------|------|----------------|------|--------------|
|            |     |              |              |             | Neale et al    |      | Yang et al |      | Hinney et al   |      | Lesch et al* |
|            |     |              |              |             | P-value        | OR   | P-value    | OR   | P-value        | OR   | P-value      |
| rs1937444  | 1   | 66,463,920   | PDE4B***     | A           | 0.94           | 0.07 | 0.35       | 0.94 | 0.72           | 0.97 | 0.052        |
| rs1557524  | 1   | 160,246,485  |              | T           | 0.88           | 0.15 | 0.46       | 1.05 | 0.60           | 0.96 | -            |
| rs7522166  | 1   | 160,276,709  | COPA***      | C           | 0.95           | 16.6 | -          | -    | 0.60           | 1.04 | -            |
| rs12333188 | 6   | 143,065,590  | GPR126       | T           | 0.88           | 0.15 | -          | -    | -              | -    | -            |
| rs1962749  | 6   | 153,551,654  |              | A           | 0.85           | 0.19 | -          | -    | -              | -    | -            |
| rs1445594  | 13  | 58,675,299   | PCDH17       | A           | 0.067          | 1.82 | 0.47       | 1.05 | 0.26           | 1.09 | 0.90         |
| s4902569   | 14  | 39,858,941   |              | G           | 0.17           | 0.73 | -          | -    | 0.97           | 1.00 | 0.16         |
| rs2415543  | 14  | 39,860,216   |              | A           | -              | -    | 0.31       | 0.93 | 0.57           | 1.05 | 0.38         |
| rs2415545  | 14  | 39,863,802   |              | A           | 0.58           | 0.55 | -          | -    | 0.26           | 1.09 | -            |
| rs3814860  | 14  | 39,868,646   | FBXO33***    | A           | 0.096          | 1.66 | -          | -    | 0.66           | 0.96 | -            |
| rs17696574 | 14  | 39,967,531   |              | G           | 0.49           | 1.44 |            |      | 0.19           | 1.10 | -            |
| rs11646443 | 16  | 84,270,476   | KCNG4***     | G           | 0.35           | 1.08 |            |      | -              | -    | -            |

\* Pooled analysis with no OR available

\*\* Base pairs according to hg19 - NCBI Build 36

\*\*\* SNP within the gene

Neale BM, Medland SE, Ripke S, Asherson P, Franke B, Lesch KP, et al (2010). Meta-analysis of genome-wide association studies of attention-deficit/hyperactivity disorder. *J Am Acad Child Adolesc Psychiatry* 49(9): 884-897.

Yang L, Neale BM, Liu L, Lee SH, Wray NR, Ji N, et al (2013). Polygenic transmission and complex neuro developmental network for attention deficit hyperactivity disorder: genome-wide association study of both common and rare variants. *Am J Med Genet B Neuropsychiatr Genet* 162B(5): 419-430.

Hinney A, Scherag A, Jarick I, Albayrak O, Putter C, Pechlivanis S, et al (2011). Genome-wide association study in German patients with attention deficit/hyperactivity disorder. *Am J Med Genet B Neuropsychiatr Genet* 156B(8): 888-897.

Lesch KP, Timmesfeld N, Renner TJ, Halperin R, Roser C, Nguyen TT, et al (2008). Molecular genetics of adult ADHD: converging evidence from genome-wide association and extended pedigree linkage studies. *J Neural Transm* 115(11): 1573-1585.

**Figure S1.** Quantile-quantile (QQ) plot from the genome-wide data

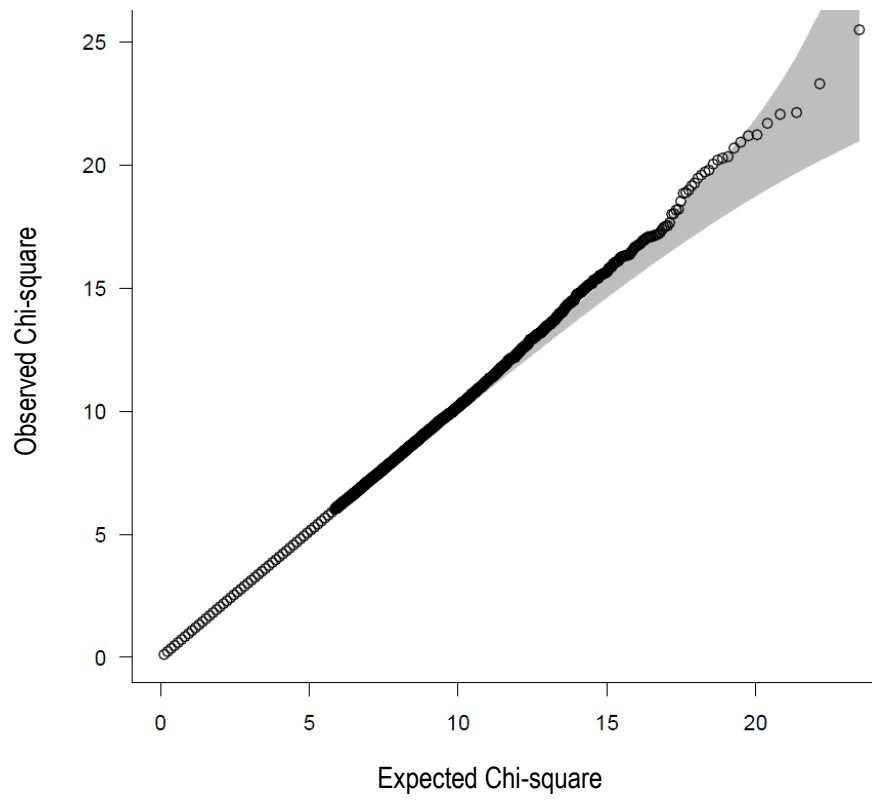

Figure S2.

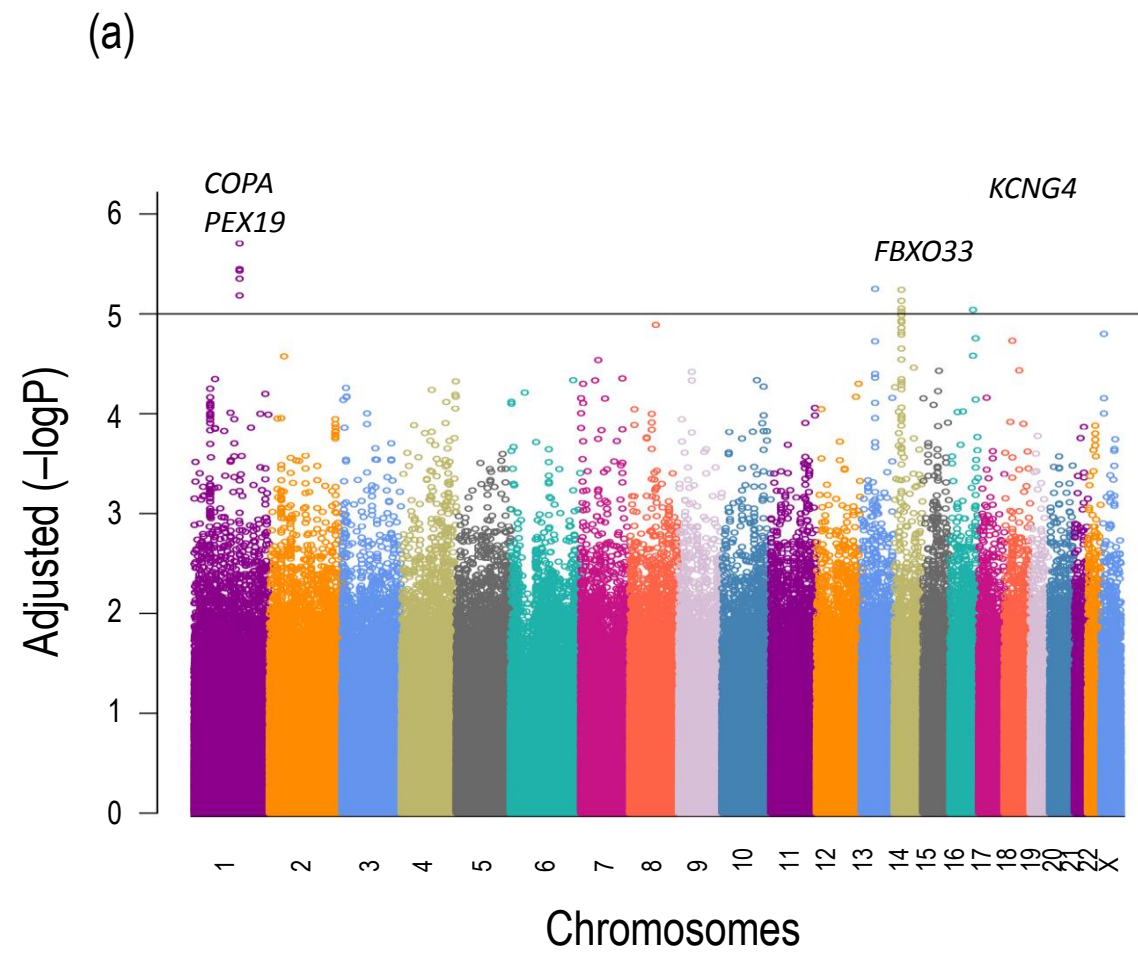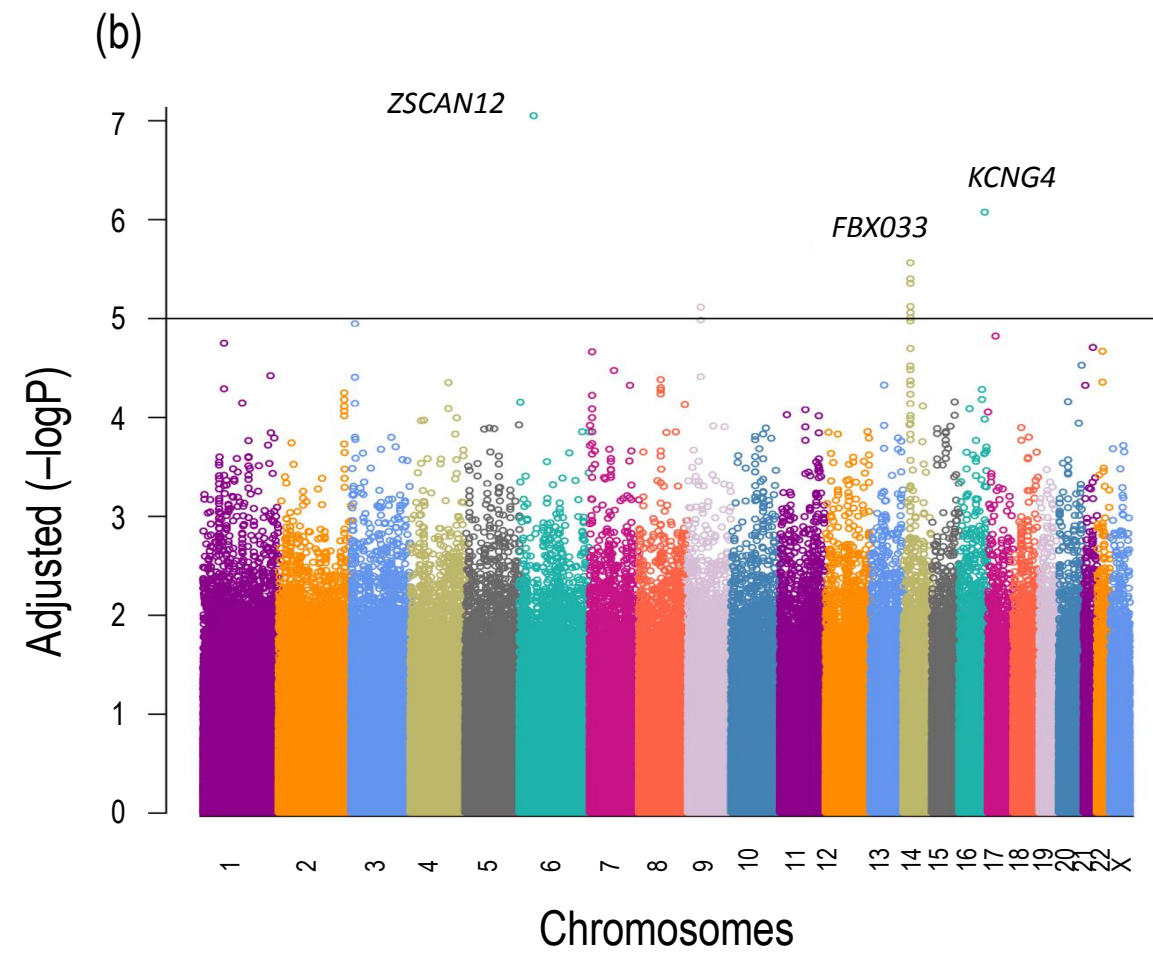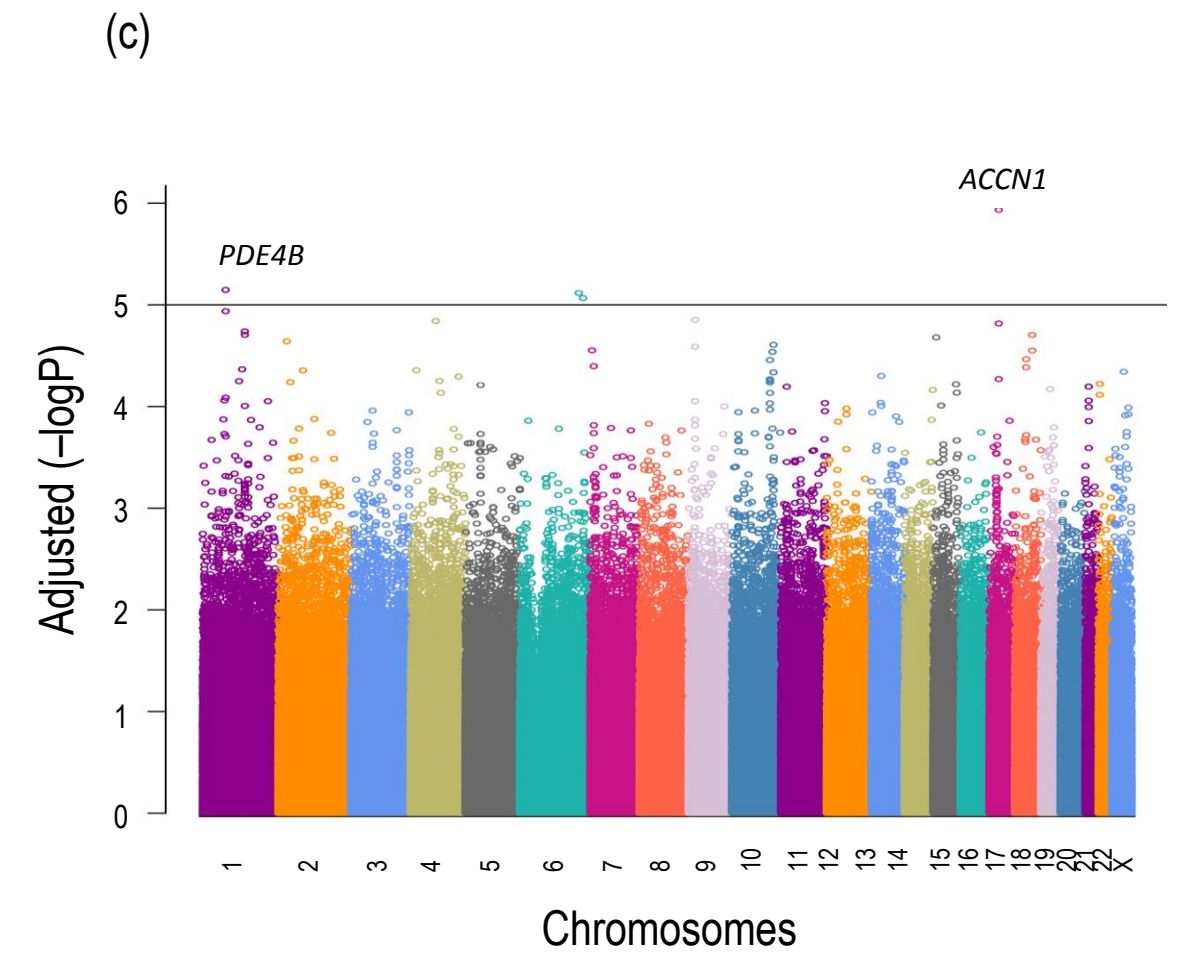

Figure S3.

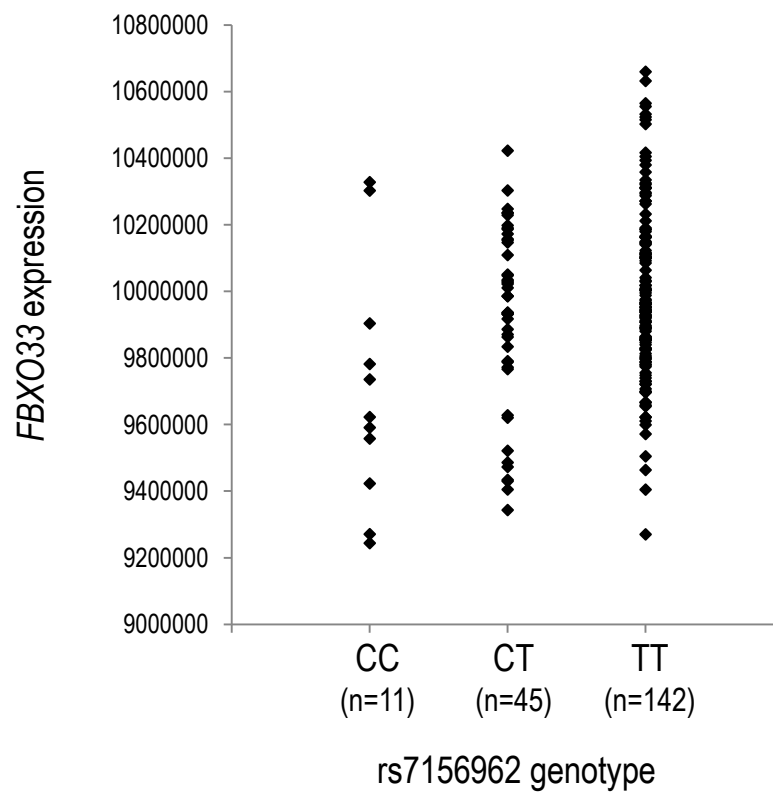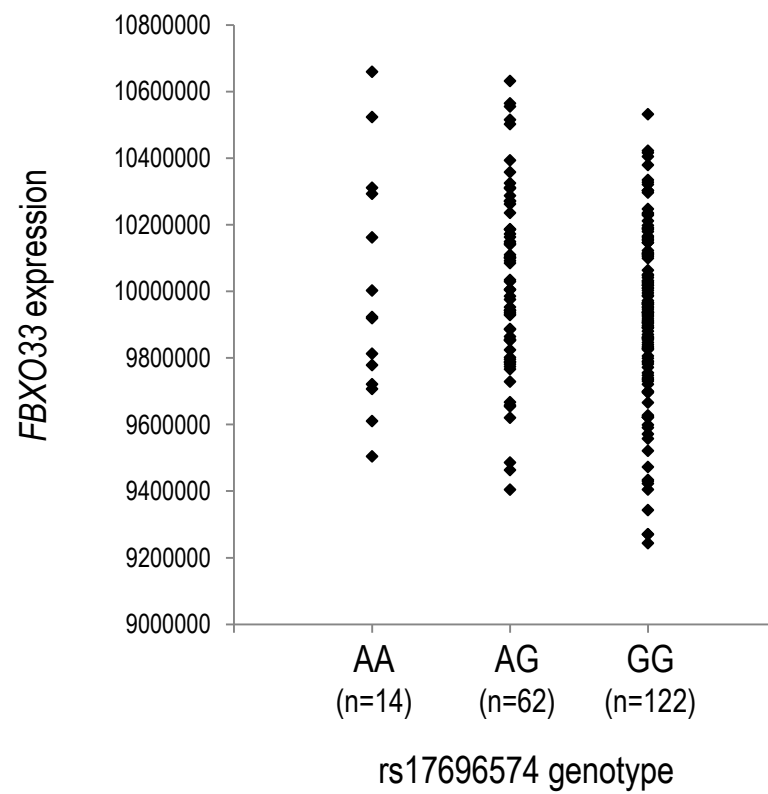

Figure S4.

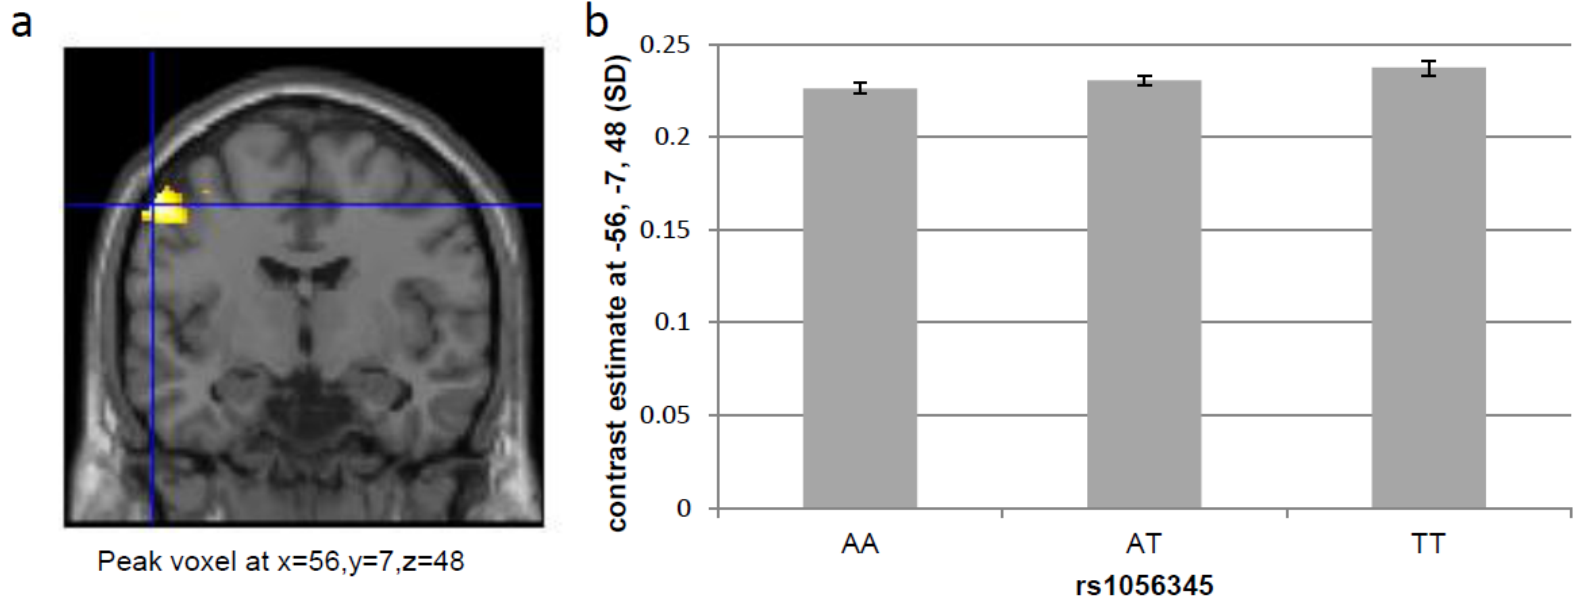

## **Clinical assessment**

### **Discovery Cohort**

The discovery cohort consisted of 607 adulthood ADHD cases (61% combined, 35% inattentive, 3.5% hyperactive-impulsive and 0.5% with undefined subtype) and 584 healthy controls from Spain. All patients were adults of Caucasian origin, recruited and evaluated at the Hospital Universitari Vall d'Hebron located in Barcelona (Spain), and met Diagnostic and Statistical Manual for Mental Disorders-IV (DSM-IV) criteria for ADHD. The diagnosis of ADHD was evaluated with the Structured Clinical Interview for DSM-IV Axis I and II Disorders (SCID-I and SCID-II) and the Conner's Adult ADHD Diagnostic Interview for DSM-IV (CAADID Parts I and II). Severity of ADHD symptoms was evaluated with the long version of the Conners' ADHD Rating Scale (self-report form CAARS-S:L and observer form CAARS-O:L), the ADHD Rating Scale (ADHD-RS), the ADHD Screening Checklist and the Wender Utah Rating Scale (WURS) for retrospective symptomatology. The level of impairment was measured with the Clinical Global Impression (CGI), included in the CAADID Part II, and the Sheehan Disability Inventory (SDI). For the evaluation of psychiatric symptoms, patients were filled in the Beck Depression Inventory (BDI), the State Trait Anxiety Inventory (STAI) and the Millon Clinical Multiaxial Inventory (MCMI-II). Full-Scale IQ was estimated with the Vocabulary and Block Design subtests of the WAIS-III. Patients also completed the digit span, arithmetic, Letter-Number Sequencing and Symbol Search subtests of the WAISIII, the Conners' Continuous Performance Test (CPT), the California Verbal Learning Test (CVLT), the Logical Memory I-II and Visual Memory I-II of the WMS-R and the trail-making test (Parts A and B). The control sample consisted of two subsets: (i) 584 unrelated blood donors frequency-matched for gender with the ADHD group in which DSM-IV life-time ADHD symptoms were excluded under the following criteria: (1) Not having previously been diagnosed with ADHD and (2) answering negatively to the life-time presence of the following DSM-IV ADHD symptoms: (a) often has trouble keeping attention on tasks, (b) often loses things

needed for tasks, (c) often fidgets with hands or feet or squirms in seat and (d) often gets up from seat when remaining in seat is expected and (ii) 149 control subjects from the Infancia y Medio Ambiente (INMA; (<http://www.proyectoima.org>)) (Guxens et al. 2012). All of them were assessed for ADHD symptoms using the DSM-IV test at the age of 4 years and controls were defined as fulfilling less or equal to four DSM-IV symptoms. All of them were born from white European parents and did not show any population substructure in the principal components analysis (PCA) using genome-wide genotypic data. The average age at assessment was 31.0 years (SD=11.7) for patients and 33.6 (SD=21.3) for control subjects.

### **Replication Cohorts**

In total, 2,104 adult ADHD patients and 1,901 controls of Caucasian origin from three European countries (Germany, The Netherlands and Norway) were recruited at three sites of The International Multicentre Persistent ADHD CollaboraTion (IMpACT; Table S1). Consensus eligibility criteria for the current study across all sites were a diagnosis of ADHD according to the diagnostic criteria of DSM-IV, onset before the age of 7 years via retrospective diagnosis (which was confirmed by a family member, wherever possible), lifelong persistence and current diagnosis. Patients were extensively examined by psychiatrists experienced in adult ADHD using open and semi-structured interviews. Other psychiatric disorders were evaluated with the Structured Clinical Interview of DSM-IV for axis-I and axis-II disorders (SCID-I, SCID-II) or semi-structured interviews. Most controls (except for the Norwegian samples and part of the German samples) were screened for the presence of ADHD and those scoring high on symptoms of the disorder were excluded. Each of these datasets has been described elsewhere (Franke et al. 2010 ; Landaas et al. 2010) For a more detailed description of the different diagnostic instruments, see Sanchez-Mora et al. et al.et al.(Sánchez-Mora et al. 2010).

The study was approved by the ethics committee of each institution and informed consent was obtained from all participants in accordance with the Helsinki Declaration.



## **Brain imaging studies**

Structural brain changes were tested by Voxel Based Morphometry (VBM) using structural T1 brain scans acquired at 1.5 Tesla and 3 Tesla scanners (Siemens, Erlangen, Germany). The scanning protocols included small variations to a standard T1-weighted 3D MPRAGE sequence (TR 2300 ms, TI 1100 ms, TE 3.03 ms, 192 sagittal slices, field of view 256 mm); however, these variations have been shown to not affect the reliability of the imaging results (Jovicich et al. 2010). Raw DICOM images were converted to NIFTI format using the conversion tool implemented in SPM5 ([www.fil.ion.ucl.ac.uk/spm/software/spm5/](http://www.fil.ion.ucl.ac.uk/spm/software/spm5/)). As a next step, the VBM 5.1 toolbox version 1.19 in SPM using priors (default settings) was used to normalize, perform a bias-correction, and segment the images into grey and white matter. This method includes an optimized VBM protocol as well as a model to increase the signal to noise ratio (Hidden Markov Random Fields) (Cuadra et al. 2005). Total Brain Volume (TBV) was defined as the sum of resulting tissue probabilities of grey and white matter volumes. The VBM analysis was performed in SPM5 and included the Diffeomorphic Anatomical registration using Exponentiated Lie Algebra (DARTEL) toolbox. Subsequently, Jacobian-scaled images were calculated and an affine transformation was used to transform to Montreal Neurological Institute (MNI) space, after which all data were smoothed with an 8 mm FWHM Gaussian smoothing kernel. Images with poor quality, artifacts or more than 1.5 times the interquartile range from the median were excluded.

## References

- Cuadra MB, Cammoun L, Butz T, Cuisenaire O, Thiran JP (2005): Comparison and validation of tissue modelization and statistical classification methods in T1-weighted MR brain images. *IEEE Trans Med Imaging* 24: 1548-1565.
- Guxens M, Ballester F, Espada M, Fernandez MF, Grimalt JO, Ibarluzea J, et al (2012). Cohort Profile: the INMA-INfancia y Medio Ambiente-(Environment and Childhood) Project. *Int J Epidemiol* 41: 930-940.
- Franke B, Vasquez AA, Johansson S, Hoogman M, Romanos J, Boreatti-Hümmer A, et al (2010). Multicenter analysis of the SLC6A3/DAT1 VNTR haplotype in persistent ADHD suggests differential involvement of the gene in childhood and persistent ADHD. *Neuropsychopharmacology*. Feb;35(3):656-64
- Jovicich J, Czanner S, Han X, Salat D, van der Kouwe A, Quinn B, et al (2009). MRI-derived measurements of human subcortical, ventricular and intracranial brain volumes: Reliability effects of scan sessions, acquisition sequences, data analyses, scanner upgrade, scanner vendors and field strengths. *Neuroimage* 46: 177-192.
- Landaas ET, Johansson S, Jacobsen KK, Ribasés M, Bosch R, Sánchez-Mora C et al (2010). An international multicenter association study of the serotonin transporter gene in persistent ADHD. *Genes Brain Behav*. Jul;9(5):449-58.
- Sánchez-Mora C, Ribasés M, Ramos-Quiroga JA, Casas M, Bosch R, Boreatti-Hümmer A et al (2010). Meta-analysis of brain-derived neurotrophic factor p.Val66Met in adult ADHD in four European populations. *Am J Med Genet B Neuropsychiatr Genet*. Mar 5;153B(2):512-23.

German ADHD GWAS GROUP:

Anke Hinney, Özgür Albayrak, Anna-Lena Volckmar, Johannes Hebebrand; Department of Child and Adolescent Psychiatry, Psychosomatics and Psychotherapy, Universitätsklinikum Essen, University of Duisburg-Essen, Essen, Germany

André Scherag; Institute for Medical Informatics, Biometry and Epidemiology (IMIBE), University of Duisburg-Essen, Essen, Germany and Clinical Epidemiology, Integrated Research and Treatment Center, Center for Sepsis Control and Care (CSCC), Jena University Hospital, Jena, Germany

Ivonne Jarick, Astrid Dempfle; Institute for Medical Biometry and Epidemiology, Philipps-University Marburg, Marburg, Germany

Sven Cichon, Per Hoffmann; Institute of Neuroscience and Medicine (INM-1), Structural and Functional Organization of the Brain, Genomic Imaging, Research Center Juelich, Juelich, Germany and Institute of Human Genetics, University of Bonn, Bonn, Germany and Human Genomics Research Group, Division of Medical Genetics, Universityhospital Basel, Department of Biomedicine

Markus M. Nöthen; Institute of Human Genetics, University of Bonn, Bonn, Germany and Department of Genomics, Life & Brain Center, University of Bonn, Bonn, Germany

Stefan Schreiber; Institute of Clinical Molecular Biology, University Hospital Schleswig-Holstein, Kiel, Germany

Karl-Heinz Jöckel; Institute for Medical Informatics, Biometry and Epidemiology (IMIBE), University of Duisburg-Essen, Essen, Germany

H.-Erich Wichmann; Institute of Epidemiology, Helmholtz Center Munich, German Research Center for Environmental Health, Munich, Germany

Beate Herpertz-Dahlmann; Department of Child and Adolescent Psychiatry, Psychosomatics and Psychotherapy, RWTH Aachen, University Clinics, Aachen, Germany

Judith Sinzig; Department of Child and Adolescent Psychiatry, University of Cologne, Cologne, Germany and Department of Child and Adolescent Psychiatry and Psychotherapy, LVR – Clinic Bonn, Bonn, Germany

Gerd Lehmkuhl; Department of Child and Adolescent Psychiatry, University of Cologne, Cologne, Germany

Tobias J. Renner; Department of Child and Adolescent Psychiatry, Universitätsklinikum Tübingen, Tübingen, Germany

Marcel Romanos; Department of Child and Adolescent Psychiatry, University of Würzburg, Würzburg, Germany

Benno G. Schimmelmann; University Hospital of Child- and Adolescent Psychiatry, University of Bern, Bern, Switzerland
